# Supplementary material for: Kidney Dysfunction Is Associated with Thrombosis and Disease Severity in Myeloproliferative Neoplasms: Implications from the German Study Group for MPN Bioregistry
Source: MDPI journal article supplement (doi:10.3390/cancers13164086), 2021-08-13
Supplement: s1 [file s1]

# Supplementary Materials: Kidney Dysfunction Is Associated with Thrombosis and Dis-ease Severity in Myeloproliferative Neoplasms: Implications from the German Study Group for MPN Bioregistry

Judith Gecht, Ioannis Tsoukakis, Kim Kricheldorf, Frank Stegelmann, Martine Klausmann, Martin Griesshammer, Holger Schulz, Wiebke Hollburg, Joachim R. Göthert, Katja Sockel, Florian H. Heidel, Norbert Gattermann, Christoph Maintz, Haifa K. Al-Ali, Uwe Platzbecker, Richard Hansen, Mathias Hänel, Stefani Parmentier, Martin Bommer, Heike L. Pahl, Fabian Lang, Martin Kirschner, Susanne Isfort, Tim H. Brümmendorf, Konstanze Döhner and Steffen Koschmieder

**Table S1.** Patient characteristics of the total cohort and by eGFR groups.

| Parameter<br>(n, % row, % column) | Category | total<br>(n, % in parameter) | eGFR1 | eGFR2 | eGFR3 | Comparison Between Pairs | p                        |
|-----------------------------------|----------|------------------------------|-------|-------|-------|--------------------------|--------------------------|
| Patients; n, % of total           | -        | 1420                         | 304   | 799   | 317   | -                        | -                        |
| Diagnosis                         | -        | 100.0                        | 21.4  | 56.3  | 22.3  | -                        | -                        |
|                                   | ET       | 546                          | 129   | 308   | 109   | ET - PV<br>eGFR1 - eGFR2 | <b>0.0188</b><br>>0.9999 |
|                                   |          | 38.45                        | 23.63 | 56.41 | 19.96 | eGFR1 - eGFR3            | >0.9999                  |
|                                   | PV       | 478                          | 102   | 279   | 97    | eGFR2 - eGFR3            | >0.9999                  |
|                                   |          | 33.66                        | 21.34 | 58.37 | 20.29 | ET - MF<br>eGFR1 - eGFR2 | <b>0.0243</b><br>0.8124  |
|                                   | MF       | 396                          | 73    | 212   | 111   | eGFR1 - eGFR3            | <b>0.0099</b>            |
|                                   |          | 27.89                        | 18.43 | 53.54 | 28.03 | eGFR2 - eGFR3            | 0.0558                   |
|                                   |          |                              | 24.01 | 26.53 | 35.02 | PV - MF<br>eGFR1 - eGFR2 | 0.0795                   |
|                                   |          |                              |       |       |       | eGFR1 - eGFR3            | >0.9999                  |
|                                   |          |                              |       |       |       | eGFR2 - eGFR3            | 0.0729                   |
|                                   |          |                              |       |       |       |                          | <b>0.0480</b>            |
| Thromboembolism                   |          |                              |       |       |       |                          | <b>0.0141</b>            |
|                                   | yes      | 414                          | 80    | 221   | 113   | eGFR1 - eGFR2            | >0.9999                  |
|                                   |          | 29.15                        | 19.32 | 53.38 | 27.29 | eGFR1 - eGFR3            | <b>0.0453</b>            |
|                                   |          |                              | 26.32 | 27.66 | 35.65 | eGFR2 - eGFR3            | <b>0.0276</b>            |
|                                   | no       | 1006                         | 224   | 578   | 204   |                          |                          |
|                                   |          | 70.85                        | 22.27 | 57.46 | 20.28 |                          |                          |
| Bleeding                          |          |                              |       |       |       |                          | 0.6449                   |
|                                   | yes      | 55                           | 14    | 31    | 10    | eGFR1 - eGFR2            | >0.9999                  |
|                                   |          | 3.87                         | 25.45 | 56.36 | 18.18 | eGFR1 - eGFR3            | >0.9999                  |
|                                   |          |                              | 4.61  | 3.88  | 3.15  | eGFR2 - eGFR3            | >0.9999                  |
|                                   | no       | 1365                         | 290   | 768   | 307   |                          |                          |
|                                   |          | 96.13                        | 21.25 | 56.26 | 22.49 |                          |                          |
| Sex                               |          |                              |       |       |       |                          | 0.0643                   |
|                                   | f        | 726                          | 144   | 403   | 179   | eGFR1 - eGFR2            | >0.9999                  |
|                                   |          | 51.13                        | 19.83 | 55.51 | 24.66 | eGFR1 - eGFR3            | 0.0741                   |
|                                   |          |                              | 47.37 | 50.44 | 56.47 | eGFR2 - eGFR3            | 0.2190                   |
|                                   | m        | 694                          | 160   | 396   | 138   |                          |                          |
|                                   |          | 48.87                        | 23.05 | 57.06 | 19.88 |                          |                          |
|                                   |          |                              | 52.63 | 49.56 | 43.53 |                          |                          |
| Age at diagnosis, years           |          |                              |       |       |       |                          | <0.0001                  |
|                                   | >60      | 606                          | 80    | 318   | 208   | eGFR1 - eGFR2            | <0.0001                  |
|                                   |          | 42.80                        | 13.20 | 52.48 | 34.32 | eGFR1 - eGFR3            | <0.0001                  |
|                                   |          |                              | 26.40 | 39.80 | 66.24 | eGFR2 - eGFR3            | <0.0001                  |
|                                   | ≤60      | 810                          | 223   | 481   | 106   |                          |                          |
|                                   |          | 57.20                        | 27.53 | 59.38 | 13.09 |                          |                          |
|                                   |          |                              | 73.60 | 60.20 | 33.76 |                          |                          |
| Age at creatinine test, years     |          |                              |       |       |       |                          | <0.0001                  |
|                                   | >60      | 780                          | 103   | 416   | 261   | eGFR1 - eGFR2            | <0.0001                  |
|                                   |          | 54.93                        | 13.21 | 53.33 | 33.46 | eGFR1 - eGFR3            | <0.0001                  |
|                                   |          |                              | 33.88 | 52.07 | 82.33 | eGFR2 - eGFR3            | <0.0001                  |

| Parameter<br>(n, % row, % column) | Category | total<br>(n, % in parameter) | eGFR1 | eGFR2 | eGFR3 | Comparison Between Pairs | p       |
|-----------------------------------|----------|------------------------------|-------|-------|-------|--------------------------|---------|
| Age at first MPN treatment, years | ≤60      | 640                          | 201   | 383   | 56    |                          |         |
|                                   |          | 45.07                        | 31.41 | 59.84 | 8.75  |                          |         |
|                                   |          |                              | 66.12 | 47.93 | 17.67 |                          |         |
|                                   | >60      | 465                          | 56    | 243   | 166   | eGFR1 - eGFR2            | <0.0001 |
|                                   |          | 49.95                        | 12.04 | 52.26 | 35.70 | eGFR1 - eGFR3            | <0.0001 |
|                                   |          |                              | 29.95 | 47.74 | 70.64 | eGFR2 - eGFR3            | <0.0001 |
| JAK2V617F mutation                | ≤60      | 466                          | 131   | 266   | 69    |                          |         |
|                                   |          | 50.05                        | 28.11 | 57.08 | 14.81 |                          |         |
|                                   |          |                              | 70.05 | 52.26 | 29.36 |                          |         |
|                                   | yes      | 964                          | 208   | 533   | 223   | eGFR1 - eGFR2            | 0.1014  |
|                                   |          | 73.31                        | 21.58 | 55.29 | 23.13 | eGFR1 - eGFR3            | >0.9999 |
|                                   |          |                              | 71.48 | 72.12 | 78.25 | eGFR2 - eGFR3            | 0.2046  |
| no                                | 351      | 83                           | 206   | 62    |       |                          |         |
|                                   | 26.69    | 23.65                        | 58.69 | 17.66 |       |                          |         |
|                                   |          | 28.52                        | 27.88 | 21.75 |       |                          |         |
| CALR mutation                     | yes      | 139                          | 39    | 82    | 18    | eGFR1 - eGFR2            | 0.0192  |
|                                   |          | 27.31                        | 28.06 | 58.99 | 12.95 | eGFR1 - eGFR3            | >0.9999 |
|                                   |          |                              | 32.23 | 29.18 | 16.82 | eGFR2 - eGFR3            | 0.0270  |
|                                   | no       | 370                          | 82    | 199   | 89    |                          |         |
|                                   |          | 72.69                        | 22.16 | 53.78 | 24.05 |                          |         |
|                                   |          |                              | 67.77 | 70.82 | 83.18 |                          |         |
| Diabetes mellitus                 | yes      | 97                           | 21    | 38    | 38    | eGFR1 - eGFR2            | <0.0001 |
|                                   |          | 7.75                         | 21.65 | 39.18 | 39.18 | eGFR1 - eGFR3            | 0.5223  |
|                                   |          |                              | 7.87  | 5.36  | 13.82 | eGFR2 - eGFR3            | 0.0834  |
|                                   | No       | 1154                         | 246   | 671   | 237   |                          |         |
|                                   |          | 92.25                        | 21.32 | 58.15 | 20.54 |                          |         |
|                                   |          |                              | 92.13 | 94.64 | 86.18 |                          |         |
| Arterial hypertension             | yes      | 468                          | 81    | 235   | 152   | eGFR1 - eGFR2            | <0.0001 |
|                                   |          | 48.95                        | 17.31 | 50.21 | 32.48 | eGFR1 - eGFR3            | 0.1260  |
|                                   |          |                              | 36.99 | 45.19 | 70.05 | eGFR2 - eGFR3            | <0.0001 |
|                                   | no       | 488                          | 138   | 285   | 65    |                          |         |
|                                   |          | 51.05                        | 28.28 | 58.40 | 13.32 |                          |         |
|                                   |          |                              | 63.01 | 54.81 | 29.95 |                          |         |
| Hyperlipidemia                    | yes      | 21                           | 3     | 10    | 8     | eGFR1 - eGFR2            | 0.0101  |
|                                   |          | 11.60                        | 14.29 | 47.62 | 38.10 | eGFR1 - eGFR3            | >0.9999 |
|                                   |          |                              | 5.77  | 10.00 | 27.59 | eGFR2 - eGFR3            | 0.0420  |
|                                   | no       | 160                          | 49    | 90    | 21    |                          |         |
|                                   |          | 88.40                        | 30.63 | 56.25 | 13.13 |                          |         |
|                                   |          |                              | 94.23 | 90.00 | 72.41 |                          |         |
| ECOG-score *,†                    | ECOG 0   | 683                          | 151   | 395   | 137   | eGFR1 - eGFR2            | 0.0184  |
|                                   |          | 69.3                         | 22.11 | 57.83 | 20.06 | eGFR1 - eGFR3            | >0.9999 |
|                                   |          |                              | 71.23 | 71.95 | 61.16 | eGFR2 - eGFR3            | 0.0780  |
|                                   | ECOG 1   | 270                          | 52    | 141   | 77    |                          |         |
|                                   |          | 27.4                         | 19.26 | 52.22 | 28.52 |                          |         |
|                                   |          |                              | 24.53 | 25.68 | 34.38 |                          |         |
|                                   | ECOG 2   | 25                           | 6     | 11    | 8     |                          |         |
|                                   |          | 2.5                          | 24.00 | 44.00 | 32.00 |                          |         |
|                                   |          |                              | 2.83  | 2.00  | 3.57  |                          |         |
|                                   | ECOG 3   | 7                            | 3     | 2     | 2     |                          |         |
|                                   |          | 0.7                          | 42.86 | 28.57 | 28.57 |                          |         |
|                                   |          |                              | 1.42  | 0.36  | 0.89  |                          |         |
| Leukocytes, G/L                   | >8.4     | 700                          | 142   | 373   | 185   | eGFR1 - eGFR2            | 0.0013  |
|                                   |          | 49.72                        | 20.29 | 53.29 | 26.43 | eGFR1 - eGFR3            | >0.9999 |
|                                   |          |                              | 46.71 | 47.28 | 58.73 | eGFR2 - eGFR3            | 0.0087  |
|                                   | ≤8.4     | 708                          | 162   | 416   | 130   |                          |         |
|                                   |          | 50.28                        | 22.88 | 58.76 | 18.36 |                          |         |
|                                   |          |                              | 53.29 | 52.72 | 41.27 |                          |         |
| Platelets, G/L                    | >492     | 697                          | 153   | 407   | 137   | eGFR1 - eGFR2            | >0.9999 |
|                                   |          | 49.96                        | 21.95 | 58.39 | 19.66 | eGFR1 - eGFR3            | 0.2715  |
|                                   |          |                              | 50.50 | 52.38 | 43.49 | eGFR2 - eGFR3            | 0.0273  |

| Parameter<br>(n, % row, % column) | Category | total<br>(n, % in parameter) | eGFR1 | eGFR2 | eGFR3 | Comparison Between Pairs | p             |
|-----------------------------------|----------|------------------------------|-------|-------|-------|--------------------------|---------------|
| Uric acid, mg/dL                  | ≤492     | 698                          | 150   | 370   | 178   |                          |               |
|                                   |          | 50.04                        | 21.49 | 53.01 | 25.50 |                          |               |
|                                   | >5.7     | 487                          | 76    | 257   | 154   | eGFR1 - eGFR2            | <0.0001       |
| Absolute neutrophil count,<br>G/L | ≤5.7     | 48.12                        | 15.61 | 52.77 | 31.62 | eGFR1 - eGFR3            | <0.0001       |
|                                   |          | 51.88                        | 34.23 | 45.25 | 69.37 | eGFR2 - eGFR3            | <0.0001       |
|                                   | >5.48    | 625                          | 125   | 339   | 161   | eGFR1 - eGFR2            | >0.9999       |
| Absolute monocyte count,<br>G/L   | ≤5.48    | 49.84                        | 20.00 | 54.24 | 25.76 | eGFR1 - eGFR3            | <b>0.0081</b> |
|                                   |          | 50.16                        | 45.96 | 47.81 | 58.97 | eGFR2 - eGFR3            | <b>0.0051</b> |
|                                   | >0.55    | 629                          | 147   | 370   | 112   |                          |               |
| LDH, U/L                          | ≤0.55    | 50.46                        | 23.37 | 58.82 | 17.81 |                          |               |
|                                   |          | 50.46                        | 54.04 | 52.19 | 41.03 |                          |               |
|                                   | >267.5   | 650                          | 135   | 342   | 173   | eGFR1 - eGFR2            | >0.9999       |
| CRP, mg/L                         | ≤267.5   | 49.54                        | 20.77 | 52.62 | 26.62 | eGFR1 - eGFR3            | <b>0.0180</b> |
|                                   |          | 50.00                        | 47.37 | 46.66 | 58.84 | eGFR2 - eGFR3            | <b>0.0012</b> |
|                                   | >1.4     | 662                          | 150   | 391   | 121   |                          |               |
| Thromboembolism                   | ≤1.4     | 50.46                        | 22.66 | 59.06 | 18.28 |                          |               |
|                                   |          | 50.46                        | 52.63 | 53.34 | 41.16 |                          |               |
|                                   | >1.4     | 678                          | 128   | 369   | 181   | eGFR1 - eGFR2            | <b>0.0001</b> |
| Bleeding                          | ≤267.5   | 50.00                        | 18.88 | 54.42 | 26.70 | eGFR1 - eGFR3            | <b>0.0003</b> |
|                                   |          | 50.00                        | 43.84 | 48.30 | 60.33 | eGFR2 - eGFR3            | <b>0.0015</b> |
|                                   | >1.4     | 678                          | 164   | 395   | 119   |                          |               |
| Sex                               | ≤1.4     | 50.00                        | 24.19 | 58.26 | 17.55 |                          |               |
|                                   |          | 51.69                        | 56.16 | 51.70 | 39.67 |                          |               |
|                                   | >1.4     | 172                          | 35    | 85    | 52    | eGFR1 - eGFR2            | >0.9999       |
| Age at diagnosis, years           | ≤1.4     | 48.31                        | 20.35 | 49.42 | 30.23 | eGFR1 - eGFR3            | 0.0813        |
|                                   |          | 51.69                        | 44.30 | 43.81 | 62.65 | eGFR2 - eGFR3            | <b>0.0171</b> |
|                                   | >1.4     | 184                          | 44    | 109   | 31    |                          |               |
| Age at diagnosis, years           | ≤1.4     | 51.69                        | 23.91 | 59.24 | 16.85 |                          |               |
|                                   |          | 51.69                        | 55.70 | 56.19 | 37.35 |                          |               |
|                                   | >1.4     | 172                          | 35    | 85    | 52    | eGFR1 - eGFR2            | >0.9999       |

\* ECOG 4 and 5 0% each. † Significance testing for ECOG 0 vs 1. Bolded values indicate significant P values.

**Table S2.** Patient characteristics by eGFR groups in ET patients

| Parameter<br>(n, % row, % column) | Category | total<br>(n, % in parameter) | eGFR1 | eGFR2 | eGFR3 | Comparison between pairs | p       |
|-----------------------------------|----------|------------------------------|-------|-------|-------|--------------------------|---------|
| Patients; n, % of total           |          | 546                          | 129   | 308   | 109   |                          |         |
|                                   |          | 100.0                        | 23.63 | 56.41 | 19.96 |                          |         |
| Thromboembolism                   | yes      | 142                          | 33    | 75    | 34    | eGFR1 - eGFR2            | >0.9999 |
|                                   |          | 26.01                        | 23.24 | 52.82 | 23.94 | eGFR1 - eGFR3            | >0.9999 |
|                                   | no       | 404                          | 25.58 | 24.35 | 31.19 | eGFR2 - eGFR3            | 0.4959  |
| Bleeding                          | yes      | 73.99                        | 96    | 233   | 75    |                          |         |
|                                   |          | 73.99                        | 23.76 | 57.67 | 18.56 |                          |         |
|                                   | no       | 529                          | 122   | 300   | 107   |                          |         |
| Sex                               | f        | 96.89                        | 23.06 | 56.71 | 20.23 |                          |         |
|                                   |          | 96.89                        | 94.57 | 97.40 | 98.17 |                          |         |
|                                   | m        | 227                          | 66    | 122   | 39    | eGFR1 - eGFR2            | 0.0321  |
| Age at diagnosis, years           | f        | 58.42                        | 19.75 | 58.31 | 21.94 | eGFR1 - eGFR3            | 0.1017  |
|                                   |          | 58.42                        | 48.84 | 60.39 | 64.22 | eGFR1 - eGFR3            | 0.0564  |
|                                   | >0.9999  | 227                          | 29.07 | 53.74 | 17.18 | eGFR2 - eGFR3            | >0.9999 |
| >0.9999                           | 41.58    | 51.16                        | 39.61 | 35.78 |       |                          |         |

| Parameter<br>(n, % row, % column) | Category | total<br>(n, % in parameter) | eGFR1  | eGFR2 | eGFR3         | Comparison between pairs | p                 |
|-----------------------------------|----------|------------------------------|--------|-------|---------------|--------------------------|-------------------|
| Age at creatinine test, years     | >60      | 195                          | 24     | 108   | 63            |                          |                   |
|                                   |          | 35.78                        | 12.31  | 55.38 | 32.31         | eGFR1 - eGFR2            | <b>0.0024</b>     |
|                                   |          |                              | 18.75  | 35.06 | 57.80         | eGFR1 - eGFR3            | <b>&lt;0.0001</b> |
|                                   | ≤60      | 350                          | 104    | 200   | 46            | eGFR2 - eGFR3            | <b>&lt;0.0001</b> |
|                                   |          | 64.22                        | 29.71  | 57.14 | 13.14         |                          |                   |
|                                   |          |                              | 81.25  | 64.94 | 42.20         |                          |                   |
|                                   |          |                              |        |       |               | <b>&lt;0.0001</b>        |                   |
| Age at first MPN treatment, years | >60      | 263                          | 34     | 145   | 84            |                          |                   |
|                                   |          | 48.17                        | 12.93  | 55.13 | 31.94         | eGFR1 - eGFR2            | <b>&lt;0.0001</b> |
|                                   |          |                              | 26.36  | 47.08 | 77.06         | eGFR1 - eGFR3            | <b>&lt;0.0001</b> |
|                                   | ≤60      | 283                          | 95     | 163   | 25            | eGFR2 - eGFR3            | <b>&lt;0.0001</b> |
|                                   |          | 51.83                        | 33.57  | 57.60 | 8.83          |                          |                   |
|                                   |          |                              | 73.64  | 52.92 | 22.94         |                          |                   |
|                                   |          |                              |        |       |               | <b>&lt;0.0001</b>        |                   |
| JAK2V617F mutation                | >60      | 163                          | 17     | 95    | 51            |                          |                   |
|                                   |          | 45.53                        | 10.43  | 58.28 | 31.29         | eGFR1 - eGFR2            | <b>&lt;0.0001</b> |
|                                   |          |                              | 20.73  | 47.98 | 65.38         | eGFR1 - eGFR3            | <b>&lt;0.0001</b> |
|                                   | ≤60      | 195                          | 65     | 103   | 27            | eGFR2 - eGFR3            | <b>0.0327</b>     |
|                                   |          | 54.47                        | 33.33  | 52.82 | 13.85         |                          |                   |
|                                   |          |                              | 79.27  | 52.02 | 34.62         |                          |                   |
|                                   |          |                              |        |       |               | <b>0.0032</b>            |                   |
| CALR mutation                     | yes      | 317                          | 66     | 176   | 75            |                          |                   |
|                                   |          | 63.15                        | 20.82  | 55.52 | 23.66         | eGFR1 - eGFR2            | 0.5505            |
|                                   |          |                              | 54.55  | 62.19 | 76.53         | eGFR1 - eGFR3            | <b>0.0030</b>     |
|                                   | no       | 185                          | 55     | 107   | 23            | eGFR2 - eGFR3            | <b>0.0291</b>     |
|                                   |          | 36.85                        | 29.73  | 57.84 | 12.43         |                          |                   |
|                                   |          |                              | 45.45  | 37.81 | 23.47         |                          |                   |
|                                   |          |                              |        |       |               | 0.1079                   |                   |
| Diabetes mellitus                 | yes      | 81                           | 28     | 46    | 7             | eGFR1 - eGFR2            |                   |
|                                   |          | 36.99                        | 34.57  | 56.79 | 8.64          | eGFR1 - eGFR3            | >0.9999           |
|                                   |          |                              | 42.42  | 38.33 | 21.21         | eGFR2 - eGFR3            | 0.1377            |
|                                   | no       | 138                          | 38     | 74    | 26            |                          |                   |
|                                   |          | 63.01                        | 27.54  | 53.62 | 18.84         |                          | 0.2922            |
|                                   |          |                              | 57.58  | 61.67 | 78.79         |                          |                   |
|                                   |          |                              |        |       |               | <b>0.0001</b>            |                   |
| Arterial hypertension             | yes      | 31                           | 8      | 8     | 15            |                          |                   |
|                                   |          | 6.40                         | 25.81  | 25.81 | 48.39         | eGFR1 - eGFR2            | 0.2685            |
|                                   |          |                              | 7.02   | 2.92  | 15.63         | eGFR1 - eGFR3            | 0.2226            |
|                                   | no       | 453                          | 106    | 266   | 81            | eGFR2 - eGFR3            | <b>&lt;0.0001</b> |
|                                   |          | 93.60                        | 23.40  | 58.72 | 17.88         |                          |                   |
|                                   |          |                              | 92.98  | 97.08 | 84.38         |                          |                   |
|                                   |          |                              |        |       |               | <b>&lt;0.0001</b>        |                   |
| Hyperlipidemia                    | yes      | 171                          | 32     | 82    | 57            | eGFR1 - eGFR2            | 0.7611            |
|                                   |          | 45.60                        | 18.71  | 47.95 | 33.33         | eGFR1 - eGFR3            | <b>&lt;0.0001</b> |
|                                   |          |                              | 32.99  | 40.20 | 77.03         | eGFR2 - eGFR3            | <b>&lt;0.0001</b> |
|                                   | no       | 204                          | 65     | 122   | 17            |                          |                   |
|                                   |          | 54.40                        | 31.86  | 59.80 | 8.33          |                          |                   |
|                                   |          |                              | 67.01  | 59.80 | 22.97         |                          |                   |
|                                   |          |                              |        |       |               | 0.3263                   |                   |
| ECOG-score <sup>+,†</sup>         | yes      | 7                            | 2      | 3     | 2             | eGFR1 - eGFR2            | >0.9999           |
|                                   |          | 10.61                        | 28.57  | 42.86 | 28.57         | eGFR1 - eGFR3            | 0.5661            |
|                                   |          |                              | 6.67   | 10.71 | 25.00         | eGFR2 - eGFR3            | 0.9144            |
|                                   | no       | 59                           | 28     | 25    | 6             |                          |                   |
|                                   |          | 89.39                        | 47.46  | 42.37 | 10.17         |                          |                   |
|                                   |          |                              | 93.33  | 89.29 | 75.00         |                          |                   |
|                                   |          |                              |        |       |               | 0.2586                   |                   |
| Leukocytes, G/L                   | ECOG 0   | 277                          | 68     | 159   | 50            | eGFR1 - eGFR2            | >0.9999           |
|                                   |          | 75.07                        | 24.55  | 57.40 | 18.05         | eGFR1 - eGFR3            | >0.9999           |
|                                   |          |                              | 73.12  | 78.71 | 67.57         | eGFR2 - eGFR3            | 0.4080            |
|                                   | ECOG 1   | 82                           | 21     | 40    | 21            |                          |                   |
|                                   |          | 22.22                        | 25.61  | 48.78 | 25.61         |                          |                   |
|                                   |          |                              | 22.58  | 19.80 | 28.38         |                          |                   |
|                                   | ECOG 2   | 9                            | 3      | 3     | 3             |                          |                   |
|                                   |          | 2.44                         | 33.33  | 33.33 | 33.33         |                          |                   |
|                                   |          |                              | 3.23   | 1.49  | 4.05          |                          |                   |
|                                   | ECOG 3   | 1                            | 1      | 0     | 0             |                          |                   |
|                                   |          | 0.27                         | 100.00 | 0     | 0             |                          |                   |
|                                   |          |                              | 1.08   |       |               |                          |                   |
|                                   |          |                              |        |       |               | 0.0685                   |                   |
| >8.4                              | 250      | 53                           | 137    | 60    | eGFR1 - eGFR2 | >0.9999                  |                   |
|                                   |          |                              |        |       |               |                          |                   |

| Parameter<br>(n, % row, % column) | Category | total<br>(n, % in parameter) | eGFR1 | eGFR2 | eGFR3 | Comparison between pairs | p             |
|-----------------------------------|----------|------------------------------|-------|-------|-------|--------------------------|---------------|
|                                   |          | 46.13                        | 21.20 | 54.80 | 24.00 | eGFR1 - eGFR3            | 0.0825        |
|                                   |          |                              | 41.09 | 44.92 | 55.56 | eGFR2 - eGFR3            | 0.2178        |
| Platelets, G/L                    | ≤8.4     | 292                          | 76    | 168   | 48    |                          |               |
|                                   |          | 53.87                        | 26.03 | 57.53 | 16.44 |                          |               |
|                                   | >492     | 409                          | 103   | 233   | 73    | eGFR1 - eGFR2            | >0.9999       |
|                                   |          | 76.02                        | 80.47 | 77.15 | 67.59 | eGFR1 - eGFR3            | 0.0762        |
| Uric acid, mg/dL                  | ≤492     | 129                          | 25    | 69    | 35    | eGFR2 - eGFR3            | 0.1623        |
|                                   |          | 23.98                        | 19.38 | 53.49 | 27.13 |                          |               |
|                                   | >5.7     | 144                          | 18    | 79    | 47    |                          | <0.0001       |
|                                   |          | 37.02                        | 12.50 | 54.86 | 32.64 | eGFR1 - eGFR2            | <b>0.0210</b> |
| Absolute neutrophil count,<br>G/L | ≤5.7     | 245                          | 73    | 144   | 28    | eGFR1 - eGFR3            | <0.0001       |
|                                   |          | 62.98                        | 29.80 | 58.78 | 11.43 | eGFR2 - eGFR3            | <0.0001       |
|                                   | >5.48    | 226                          | 43    | 129   | 54    |                          | <b>0.0304</b> |
|                                   |          | 45.75                        | 19.03 | 57.08 | 23.89 | eGFR1 - eGFR2            | 0.3564        |
| Absolute monocyte count,<br>G/L   | ≤5.48    | 268                          | 73    | 151   | 44    | eGFR1 - eGFR3            | <b>0.0273</b> |
|                                   |          | 54.25                        | 27.24 | 56.34 | 16.42 | eGFR2 - eGFR3            | 0.3861        |
|                                   | >0.55    | 263                          | 52    | 149   | 62    |                          | <b>0.0494</b> |
|                                   |          | 51.27                        | 19.77 | 56.65 | 23.57 | eGFR1 - eGFR2            | 0.5751        |
| LDH, U/L                          | ≤0.55    | 250                          | 67    | 142   | 41    | eGFR1 - eGFR3            | <b>0.0474</b> |
|                                   |          | 48.73                        | 26.80 | 56.80 | 16.40 | eGFR2 - eGFR3            | 0.4056        |
|                                   | >267.5   | 184                          | 38    | 102   | 44    |                          | 0.2112        |
|                                   |          | 34.72                        | 20.65 | 55.43 | 23.91 | eGFR1 - eGFR2            | >0.9999       |
| CRP, mg/L                         | ≤267.5   | 346                          | 88    | 195   | 63    | eGFR1 - eGFR3            | 0.2958        |
|                                   |          | 65.28                        | 25.43 | 56.36 | 18.21 | eGFR2 - eGFR3            | 0.7221        |
|                                   | >1.4     | 51                           | 13    | 25    | 13    |                          | 0.3321        |
|                                   |          | 40.48                        | 25.49 | 49.02 | 25.49 | eGFR1 - eGFR2            | >0.9999       |
|                                   | ≤1.4     | 75                           | 26    | 37    | 12    | eGFR1 - eGFR3            | 0.5790        |
|                                   |          | 59.52                        | 34.67 | 49.33 | 16.00 | eGFR2 - eGFR3            | >0.9999       |
|                                   |          |                              | 66.67 | 59.68 | 48.00 |                          |               |

\* ECOG 4 and 5 0% each. † Significance testing for ECOG 0 vs 1. Bolded values indicate significant P values.

**Table S3.** Patient characteristics by eGFR groups in PV patients

| Parameter<br>(n, % row, % column) | Category | total<br>(n, % in parameter) | eGFR1 | eGFR2 | eGFR3 | Comparison between pairs | p             |
|-----------------------------------|----------|------------------------------|-------|-------|-------|--------------------------|---------------|
| Patients; n, % of total           |          | 478                          | 102   | 279   | 97    |                          |               |
| Thromboembolism                   | yes      | 161                          | 31    | 86    | 44    |                          | <b>0.0243</b> |
|                                   |          | 33.68                        | 19.25 | 53.42 | 27.33 | eGFR1 - eGFR2            | >0.9999       |
|                                   | no       | 317                          | 30.39 | 30.82 | 45.36 | eGFR1 - eGFR3            | 0.1206        |
|                                   |          | 66.32                        | 71    | 193   | 53    | eGFR2 - eGFR3            | <b>0.0387</b> |
| Bleeding                          | yes      | 20                           | 5     | 13    | 2     | eGFR1 - eGFR2            | 0.5696        |
|                                   |          | 4.18                         | 25.00 | 65.00 | 10.00 | eGFR1 - eGFR3            | >0.9999       |
|                                   | no       | 458                          | 4.90  | 4.66  | 2.06  | eGFR2 - eGFR3            | >0.9999       |
|                                   |          | 95.82                        | 97    | 266   | 95    |                          |               |
|                                   |          |                              | 21.18 | 58.08 | 20.74 |                          |               |

| Parameter<br>(n, % row, % column) | Category | total<br>(n, % in parameter) | eGFR1                | eGFR2                 | eGFR3                 | Comparison between pairs                        | p                                                       |
|-----------------------------------|----------|------------------------------|----------------------|-----------------------|-----------------------|-------------------------------------------------|---------------------------------------------------------|
|                                   |          |                              | 95.10                | 95.34                 | 97.94                 |                                                 |                                                         |
| Sex                               |          |                              |                      |                       |                       |                                                 | <b>0.0378</b>                                           |
|                                   | f        | 240<br>50.21                 | 44<br>18.33<br>43.14 | 137<br>57.08<br>49.10 | 59<br>24.58<br>60.82  | eGFR1 - eGFR2<br>eGFR1 - eGFR3<br>eGFR2 - eGFR3 | >0.9999<br><b>0.0474</b><br>0.1764                      |
|                                   | m        | 238<br>49.79                 | 58<br>24.37<br>56.86 | 142<br>59.66<br>50.90 | 38<br>15.97<br>39.18  |                                                 |                                                         |
| Age at diagnosis, years           |          |                              |                      |                       |                       |                                                 | <b>&lt;0.0001</b>                                       |
|                                   | >60      | 224<br>46.96                 | 30<br>13.39<br>29.41 | 125<br>55.80<br>44.80 | 69<br>30.80<br>71.88  | eGFR1 - eGFR2<br>eGFR1 - eGFR3<br>eGFR2 - eGFR3 | <b>0.0207</b><br><b>&lt;0.0001</b><br><b>&lt;0.0001</b> |
|                                   | ≤60      | 253<br>53.04                 | 72<br>28.46<br>70.59 | 154<br>60.87<br>55.20 | 27<br>10.67<br>28.13  |                                                 |                                                         |
| Age at creatinine test, years     |          |                              |                      |                       |                       |                                                 | <b>&lt;0.0001</b>                                       |
|                                   | >60      | 293<br>61.30                 | 41<br>13.99<br>40.20 | 165<br>56.31<br>59.14 | 87<br>29.69<br>89.69  | eGFR1 - eGFR2<br>eGFR1 - eGFR3<br>eGFR2 - eGFR3 | <b>0.0033</b><br><b>&lt;0.0001</b><br><b>&lt;0.0001</b> |
|                                   | ≤60      | 185<br>38.70                 | 61<br>32.97<br>59.80 | 114<br>61.62<br>40.86 | 10<br>5.41<br>10.31   |                                                 |                                                         |
| Age at first MPN treatment, years |          |                              |                      |                       |                       |                                                 | <b>&lt;0.0001</b>                                       |
|                                   | >60      | 171<br>55.88                 | 20<br>11.70<br>33.90 | 93<br>54.39<br>53.45  | 58<br>33.92<br>79.45  | eGFR1 - eGFR2<br>eGFR1 - eGFR3<br>eGFR2 - eGFR3 | <b>0.0315</b><br><b>&lt;0.0001</b><br><b>0.0003</b>     |
|                                   | ≤60      | 135<br>44.12                 | 39<br>28.89<br>66.10 | 81<br>60.00<br>46.55  | 15<br>11.11<br>20.55  |                                                 |                                                         |
| JAK2V617F mutation                |          |                              |                      |                       |                       |                                                 | 0.2881                                                  |
|                                   | yes      | 419<br>92.29                 | 96<br>22.91<br>96.00 | 242<br>57.76<br>91.32 | 81<br>19.33<br>91.01  | eGFR1 - eGFR2<br>eGFR1 - eGFR3<br>eGFR2 - eGFR3 | 0.5328<br>0.6978<br>>0.9999                             |
|                                   | no       | 35<br>7.71                   | 4<br>11.43<br>4.00   | 23<br>65.71<br>8.68   | 8<br>22.86<br>8.99    |                                                 |                                                         |
| CALR mutation                     |          |                              |                      |                       |                       |                                                 | 0.3973                                                  |
|                                   | yes      | 2<br>1.63                    | 1<br>50.00<br>4.55   | 1<br>50.00<br>1.47    | 0<br>0.00<br>0.00     | eGFR1 - eGFR2<br>eGFR1 - eGFR3<br>eGFR2 - eGFR3 | >0.9999<br>>0.9999<br>>0.9999                           |
|                                   | no       | 121<br>98.37                 | 21<br>17.36<br>95.45 | 67<br>55.37<br>98.53  | 33<br>27.27<br>100.00 |                                                 |                                                         |
| Diabetes mellitus                 |          |                              |                      |                       |                       |                                                 | 0.4161                                                  |
|                                   | yes      | 41<br>9.49                   | 12<br>29.27<br>12.50 | 20<br>48.78<br>8.00   | 9<br>21.95<br>10.47   | eGFR1 - eGFR2<br>eGFR1 - eGFR3<br>eGFR2 - eGFR3 | 0.6459<br>>0.9999<br>>0.9999                            |
|                                   | no       | 391<br>90.51                 | 84<br>21.48<br>87.50 | 230<br>58.82<br>92.00 | 77<br>19.69<br>89.53  |                                                 |                                                         |
| Arterial hypertension             |          |                              |                      |                       |                       |                                                 | 0.0560                                                  |
|                                   | yes      | 189<br>62.79                 | 35<br>18.52<br>53.03 | 105<br>55.56<br>62.50 | 49<br>25.93<br>73.13  | eGFR1 - eGFR2<br>eGFR1 - eGFR3<br>eGFR2 - eGFR3 | 0.5604<br>0.0594<br>0.3936                              |
|                                   | no       | 112<br>37.21                 | 31<br>27.68<br>46.97 | 63<br>56.25<br>37.50  | 18<br>16.07<br>26.87  |                                                 |                                                         |
| Hyperlipidemia                    |          |                              |                      |                       |                       |                                                 | 0.5809                                                  |
|                                   | yes      | 8<br>17.02                   | 1<br>12.50<br>9.09   | 6<br>75.00<br>18.18   | 1<br>12.50<br>33.33   | eGFR1 - eGFR2<br>eGFR1 - eGFR3<br>eGFR2 - eGFR3 | >0.9999<br>>0.9999<br>>0.9999                           |
|                                   | no       | 39<br>82.98                  | 10<br>25.64<br>90.91 | 27<br>69.23<br>81.82  | 2<br>5.13<br>66.67    |                                                 |                                                         |
| ECOG-score <sup>*,†</sup>         |          |                              |                      |                       |                       |                                                 | 0.3696                                                  |
|                                   | ECOG 0   | 236<br>70.87                 | 50<br>21.19<br>76.92 | 133<br>56.36<br>67.86 | 53<br>22.46<br>73.61  | eGFR1 - eGFR2<br>eGFR1 - eGFR3<br>eGFR2 - eGFR3 | 0.6075<br>>0.9999<br>>0.9999                            |
|                                   | ECOG 1   | 92<br>27.63                  | 14<br>15.22          | 59<br>64.13           | 19<br>20.65           |                                                 |                                                         |

| Parameter<br>(n, % row, % column) | Category | total<br>(n, % in parameter) | eGFR1                | eGFR2                 | eGFR3                | Comparison between pairs       | p                       |
|-----------------------------------|----------|------------------------------|----------------------|-----------------------|----------------------|--------------------------------|-------------------------|
|                                   |          |                              | 21.54                | 30.10                 | 26.39                |                                |                         |
|                                   | ECOG 2   | 4<br>1.20                    | 1<br>25.00<br>1.54   | 3<br>75.00<br>1.53    | 0                    |                                |                         |
|                                   | ECOG 3   | 1<br>0.30                    | 0                    | 1<br>100.00<br>0.51   | 0                    |                                |                         |
| Leukocytes, G/L                   |          |                              |                      |                       |                      |                                | 0.4807                  |
|                                   | >8.4     | 269<br>57.11                 | 54<br>20.07<br>52.94 | 156<br>57.99<br>57.14 | 59<br>21.93<br>61.46 | eGFR1 - eGFR2<br>eGFR1 - eGFR3 | >0.9999<br>0.7563       |
|                                   | ≤8.4     | 202<br>42.89                 | 48<br>23.76<br>47.06 | 117<br>57.92<br>42.86 | 37<br>18.32<br>38.54 | eGFR2 - eGFR3                  | >0.9999                 |
| Platelets, G/L                    |          |                              |                      |                       |                      |                                | 0.5275                  |
|                                   | >492     | 173<br>37.12                 | 33<br>19.08<br>32.35 | 103<br>59.54<br>38.58 | 37<br>21.39<br>38.14 | eGFR1 - eGFR2<br>eGFR1 - eGFR3 | 0.8406<br>>0.9999       |
|                                   | ≤492     | 293<br>62.88                 | 69<br>23.55<br>67.65 | 164<br>55.97<br>61.42 | 60<br>20.48<br>61.86 | eGFR2 - eGFR3                  | >0.9999                 |
| Uric acid, mg/dL                  |          |                              |                      |                       |                      |                                | <b>0.0014</b>           |
|                                   | >5.7     | 186<br>51.24                 | 34<br>18.28<br>40.96 | 101<br>54.30<br>49.03 | 51<br>27.42<br>68.92 | eGFR1 - eGFR2<br>eGFR1 - eGFR3 | 0.7251<br><b>0.0021</b> |
|                                   | ≤5.7     | 177<br>48.76                 | 49<br>27.68<br>59.04 | 105<br>59.32<br>50.97 | 23<br>12.99<br>31.08 | eGFR2 - eGFR3                  | <b>0.0123</b>           |
| Absolute neutrophil count,<br>G/L |          |                              |                      |                       |                      |                                | 0.2392                  |
|                                   | >5.48    | 245<br>60.05                 | 52<br>21.22<br>57.14 | 139<br>56.73<br>58.40 | 54<br>22.04<br>68.35 | eGFR1 - eGFR2<br>eGFR1 - eGFR3 | >0.9999<br>0.4632       |
|                                   | ≤5.48    | 163<br>39.95                 | 39<br>23.93<br>42.86 | 99<br>60.74<br>41.60  | 25<br>15.34<br>31.65 | eGFR2 - eGFR3                  | 0.4296                  |
| Absolute monocyte count,<br>G/L   |          |                              |                      |                       |                      |                                | <b>0.0244</b>           |
|                                   | >0.55    | 218<br>50.46                 | 54<br>24.77<br>55.67 | 111<br>50.92<br>44.94 | 53<br>24.31<br>60.23 | eGFR1 - eGFR2<br>eGFR1 - eGFR3 | 0.2787<br>>0.9999       |
|                                   | ≤0.55    | 214<br>49.54                 | 43<br>20.09<br>44.33 | 136<br>63.55<br>55.06 | 35<br>16.36<br>39.77 | eGFR2 - eGFR3                  | 0.0540                  |
| LDH, U/L                          |          |                              |                      |                       |                      |                                | <b>0.0466</b>           |
|                                   | >267.5   | 205<br>45.66                 | 43<br>20.98<br>43.88 | 111<br>54.15<br>42.37 | 51<br>24.88<br>57.30 | eGFR1 - eGFR2<br>eGFR1 - eGFR3 | >0.9999<br>0.2382       |
|                                   | ≤267.5   | 244<br>54.34                 | 55<br>22.54<br>56.12 | 151<br>61.89<br>57.63 | 38<br>15.57<br>42.70 | eGFR2 - eGFR3                  | 0.0573                  |
| CRP, mg/L                         |          |                              |                      |                       |                      |                                | 0.3641                  |
|                                   | >1.4     | 55<br>45.45                  | 10<br>18.18<br>43.48 | 31<br>56.36<br>41.89  | 14<br>25.45<br>58.33 | eGFR1 - eGFR2<br>eGFR1 - eGFR3 | >0.9999<br>>0.9999      |
|                                   | ≤1.4     | 66<br>54.55                  | 13<br>19.70<br>56.52 | 43<br>65.15<br>58.11  | 10<br>15.15<br>41.67 | eGFR2 - eGFR3                  | 0.7149                  |

\* ECOG 4 and 5 0% each. † Significance testing for ECOG 0 vs 1. Bolded values indicate significant P values.

**Table S4.** Patient characteristics by eGFR groups in MF patients

| Parameter<br>(n, % row, % column) | Category | total<br>(n, % in parameter) | eGFR1                | eGFR2                | eGFR3                | Comparison between pairs                        | p                            |
|-----------------------------------|----------|------------------------------|----------------------|----------------------|----------------------|-------------------------------------------------|------------------------------|
| Patients; n, % of total           |          | 396<br>100.0                 | 73<br>18.43          | 212<br>53.54         | 111<br>28.03         |                                                 |                              |
| Thromboembolism                   |          |                              |                      |                      |                      |                                                 | 0.3616                       |
|                                   | yes      | 111<br>28.03                 | 16<br>14.41<br>21.92 | 60<br>54.05<br>28.30 | 35<br>31.53<br>31.53 | eGFR1 - eGFR2<br>eGFR1 - eGFR3<br>eGFR2 - eGFR3 | >0.9999<br>0.5391<br>>0.9999 |

| Parameter<br>(n, % row, % column) | Category | total<br>(n, % in parameter) | eGFR1 | eGFR2 | eGFR3 | Comparison between pairs | p       |
|-----------------------------------|----------|------------------------------|-------|-------|-------|--------------------------|---------|
| Bleeding                          | no       | 285                          | 57    | 152   | 76    |                          |         |
|                                   |          | 71.97                        | 20.00 | 53.33 | 26.67 |                          |         |
| Sex                               | yes      | 18                           | 2     | 10    | 6     |                          | 0.6865  |
|                                   |          | 4.55                         | 11.11 | 55.56 | 33.33 | eGFR1 - eGFR2            | >0.9999 |
| Age at diagnosis, years           | no       | 378                          | 71    | 202   | 105   | eGFR1 - eGFR3            | >0.9999 |
|                                   |          | 95.45                        | 18.78 | 53.44 | 27.78 | eGFR2 - eGFR3            | >0.9999 |
| Age at creatinine test, years     | f        | 229                          | 37    | 80    | 50    |                          | 0.1191  |
|                                   |          | 57.83                        | 15.72 | 57.64 | 26.64 |                          |         |
| Age at first MPN treatment, years | m        | 167                          | 22.16 | 47.90 | 29.94 | eGFR1 - eGFR2            | 0.1653  |
|                                   |          | 42.17                        | 50.68 | 37.74 | 45.05 | eGFR1 - eGFR3            | >0.9999 |
| JAK2V617F mutation                | >60      | 229                          | 36    | 132   | 61    | eGFR2 - eGFR3            | 0.6975  |
|                                   |          | 57.83                        | 15.72 | 57.64 | 26.64 |                          |         |
| CALR mutation                     | >60      | 207                          | 47    | 127   | 33    |                          | <0.0001 |
|                                   |          | 52.54                        | 22.71 | 61.35 | 15.94 | eGFR1 - eGFR2            | >0.9999 |
| Diabetes mellitus                 | ≤60      | 207                          | 22.71 | 61.35 | 15.94 | eGFR1 - eGFR3            | <0.0001 |
|                                   |          | 52.54                        | 64.38 | 59.91 | 30.28 | eGFR2 - eGFR3            | <0.0001 |
| Arterial hypertension             | >60      | 224                          | 28    | 106   | 90    |                          | <0.0001 |
|                                   |          | 56.57                        | 12.50 | 47.32 | 40.18 | eGFR1 - eGFR2            | 0.3084  |
| Hyperlipidemia                    | ≤60      | 172                          | 45    | 106   | 21    | eGFR1 - eGFR3            | <0.0001 |
|                                   |          | 43.43                        | 26.16 | 61.63 | 12.21 | eGFR2 - eGFR3            | <0.0001 |
| Diabetes mellitus                 | >60      | 131                          | 19    | 55    | 57    |                          | 0.0002  |
|                                   |          | 49.06                        | 14.50 | 41.98 | 43.51 | eGFR1 - eGFR2            | >0.9999 |
| JAK2V617F mutation                | ≤60      | 136                          | 27    | 82    | 27    | eGFR1 - eGFR3            | 0.0015  |
|                                   |          | 50.94                        | 19.85 | 60.29 | 19.85 | eGFR2 - eGFR3            | <0.0001 |
| CALR mutation                     | yes      | 228                          | 46    | 115   | 67    |                          | 0.3602  |
|                                   |          | 63.51                        | 20.18 | 50.44 | 29.39 | eGFR1 - eGFR2            | >0.9999 |
| Diabetes mellitus                 | no       | 131                          | 24    | 76    | 31    | eGFR1 - eGFR3            | >0.9999 |
|                                   |          | 36.49                        | 18.32 | 58.02 | 23.66 | eGFR2 - eGFR3            | 0.5967  |
| Arterial hypertension             | yes      | 111                          | 23    | 58    | 30    |                          | 0.4311  |
|                                   |          | 66.47                        | 20.72 | 52.25 | 27.03 | eGFR1 - eGFR2            | >0.9999 |
| Diabetes mellitus                 | no       | 56                           | 10    | 35    | 11    | eGFR1 - eGFR3            | >0.9999 |
|                                   |          | 33.53                        | 17.86 | 62.50 | 19.64 | eGFR2 - eGFR3            | >0.9999 |
| Arterial hypertension             | yes      | 111                          | 23    | 58    | 30    |                          | 0.7308  |
|                                   |          | 66.47                        | 20.72 | 52.25 | 27.03 |                          |         |
| Diabetes mellitus                 | no       | 25                           | 1     | 10    | 14    |                          | 0.0031  |
|                                   |          | 7.46                         | 4.00  | 40.00 | 56.00 | eGFR1 - eGFR2            | >0.9999 |
| Arterial hypertension             | yes      | 310                          | 56    | 175   | 79    | eGFR1 - eGFR3            | 0.0288  |
|                                   |          | 92.54                        | 18.06 | 56.45 | 25.48 | eGFR2 - eGFR3            | 0.0342  |
| Hyperlipidemia                    | no       | 108                          | 14    | 48    | 46    |                          | <0.0001 |
|                                   |          | 38.57                        | 12.96 | 44.44 | 42.59 | eGFR1 - eGFR2            | >0.9999 |
| Diabetes mellitus                 | yes      | 172                          | 42    | 100   | 30    | eGFR1 - eGFR3            | <0.0001 |
|                                   |          | 61.43                        | 24.42 | 58.14 | 17.44 | eGFR2 - eGFR3            | <0.0001 |
| Arterial hypertension             | no       | 6                            | 0     | 1     | 5     |                          | 0.0041  |
|                                   |          | 8.82                         | 0.00  | 16.67 | 83.33 | eGFR1 - eGFR2            | >0.9999 |
| Hyperlipidemia                    | yes      | 6                            | 0     | 1     | 5     | eGFR1 - eGFR3            | 0.3783  |
|                                   |          | 8.82                         | 0.00  | 16.67 | 83.33 |                          |         |



| Parameter<br>(n, % row, % column) | Category | total<br>(n, % in parameter) | eGFR1                 | eGFR2                 | eGFR3                | Comparison between pairs                        | p                                         |
|-----------------------------------|----------|------------------------------|-----------------------|-----------------------|----------------------|-------------------------------------------------|-------------------------------------------|
|                                   |          |                              | 0.00                  | 2.5                   | 27.78                | eGFR2 - eGFR3                                   | <b>0.0291</b>                             |
|                                   | no       | 62<br>91.18                  | 11<br>17.74<br>100.00 | 38<br>61.29<br>97.44  | 13<br>20.97<br>72.22 |                                                 |                                           |
| ECOG-score <sup>†</sup>           |          |                              |                       |                       |                      |                                                 | <b>0.0042</b>                             |
|                                   | ECOG 0   | 170<br>60.07                 | 33<br>19.41<br>61.11  | 103<br>60.59<br>68.21 | 34<br>20.00<br>43.59 | eGFR1-eGFR2<br>eGFR1-eGFR3<br>eGFR2-eGFR3       | >0.9999<br>0.1902<br><b>0.0045</b>        |
|                                   | ECOG 1   | 96<br>33.92                  | 17<br>17.71<br>31.48  | 42<br>43.75<br>27.81  | 37<br>38.54<br>47.44 |                                                 |                                           |
|                                   | ECOG 2   | 12<br>4.24                   | 2<br>16.67<br>3.70    | 5<br>41.67<br>3.31    | 5<br>41.67<br>6.41   |                                                 |                                           |
|                                   | ECOG 3   | 5<br>1.77                    | 2<br>40.00<br>3.70    | 1<br>20.00<br>0.66    | 2<br>40.00<br>2.56   |                                                 |                                           |
| Leukocytes, G/L                   |          |                              |                       |                       |                      |                                                 | <b>0.0010</b>                             |
|                                   | >8.4     | 181<br>45.82                 | 35<br>19.34<br>47.95  | 80<br>44.20<br>37.91  | 66<br>36.46<br>59.46 | eGFR1 - eGFR2<br>eGFR1 - eGFR3<br>eGFR2 - eGFR3 | 0.4992<br>0.3987<br><b>0.0009</b>         |
|                                   | ≤8.4     | 214<br>54.18                 | 38<br>17.76<br>52.05  | 131<br>61.21<br>62.09 | 45<br>21.03<br>40.54 |                                                 |                                           |
| Platelets, G/L                    |          |                              |                       |                       |                      |                                                 | 0.0904                                    |
|                                   | >492     | 115<br>29.41                 | 17<br>14.78<br>23.29  | 71<br>61.74<br>34.13  | 27<br>23.48<br>24.55 | eGFR1 - eGFR2<br>eGFR1 - eGFR3<br>eGFR2 - eGFR3 | 0.3192<br>>0.9999<br>0.2904               |
|                                   | ≤492     | 276<br>70.59                 | 56<br>20.29<br>76.71  | 137<br>49.64<br>65.87 | 83<br>30.07<br>75.45 |                                                 |                                           |
| Uric acid, mg/dL                  |          |                              |                       |                       |                      |                                                 | <b>0.0028</b>                             |
|                                   | >5.7     | 157<br>60.38                 | 24<br>15.29<br>50.00  | 77<br>49.04<br>55.40  | 56<br>35.67<br>76.71 | eGFR1 - eGFR2<br>eGFR1 - eGFR3<br>eGFR2 - eGFR3 | >0.9999<br><b>0.0096</b><br><b>0.0081</b> |
|                                   | ≤5.7     | 103<br>39.62                 | 24<br>23.30<br>50.00  | 62<br>60.19<br>44.60  | 17<br>16.50<br>23.29 |                                                 |                                           |
| Absolute neutrophil count,<br>G/L |          |                              |                       |                       |                      |                                                 | <b>0.0134</b>                             |
|                                   | >5.48    | 154<br>43.75                 | 30<br>19.48<br>46.15  | 71<br>46.10<br>37.17  | 53<br>34.42<br>55.21 | eGFR1 - eGFR2<br>eGFR1 - eGFR3<br>eGFR2 - eGFR3 | 0.7200<br>0.7992<br><b>0.0159</b>         |
|                                   | ≤5.48    | 198<br>56.25                 | 35<br>17.68<br>53.85  | 120<br>60.61<br>62.83 | 43<br>21.72<br>44.79 |                                                 |                                           |
| Absolute monocyte count,<br>G/L   |          |                              |                       |                       |                      |                                                 | <b>0.0481</b>                             |
|                                   | >0.55    | 169<br>46.05                 | 29<br>17.16<br>42.03  | 82<br>48.52<br>42.05  | 58<br>34.32<br>56.31 | eGFR1 - eGFR2<br>eGFR1 - eGFR3<br>eGFR2 - eGFR3 | >0.9999<br>0.2604<br>0.0624               |
|                                   | ≤0.55    | 198<br>53.95                 | 40<br>20.20<br>57.97  | 113<br>57.07<br>57.95 | 45<br>22.73<br>43.69 |                                                 |                                           |
| LDH, U/L                          |          |                              |                       |                       |                      |                                                 | 0.1157                                    |
|                                   | >267.5   | 289<br>76.66                 | 47<br>16.26<br>69.12  | 156<br>53.98<br>76.10 | 86<br>29.76<br>82.69 | eGFR1 - eGFR2<br>eGFR1 - eGFR3<br>eGFR2 - eGFR3 | 0.7944<br>0.1269<br>0.5781                |
|                                   | ≤267.5   | 88<br>23.34                  | 21<br>23.86<br>30.88  | 49<br>55.68<br>23.90  | 18<br>20.45<br>17.31 |                                                 |                                           |
| CRP, mg/L                         |          |                              |                       |                       |                      |                                                 | 0.0545                                    |
|                                   | >1.4     | 66<br>60.55                  | 12<br>18.18<br>70.59  | 29<br>43.94<br>50.00  | 25<br>37.88<br>73.53 | eGFR1 - eGFR2<br>eGFR1 - eGFR3<br>eGFR2 - eGFR3 | 0.5130<br>>0.9999<br>0.0915               |
|                                   | ≤1.4     | 43<br>39.45                  | 5<br>11.63<br>29.41   | 29<br>67.44<br>50.00  | 9<br>20.93<br>26.47  |                                                 |                                           |

\* ECOG 4 and 5 0% each. † Significance testing for ECOG 0 vs 1. Bolded values indicate significant P values.

Table S5. Correlations between uric acid, leukocytes, LDH, and platelets

| MPN subtype<br>( <i>n</i> , % row, % column) | Uric acid, mg/dL<br>( <i>n</i> , % subgroup) | Leukocytes, G/L |       | LDH, U/L |        | Platelets, G/L |       | Significance |
|----------------------------------------------|----------------------------------------------|-----------------|-------|----------|--------|----------------|-------|--------------|
|                                              |                                              | >8.4            | ≤8.4  | >267.5   | ≤267.5 | >492           | ≤492  |              |
| All patients ( <i>n</i> = 1012)              |                                              |                 |       |          |        |                |       |              |
| all eGFR groups                              | >5.7                                         | 283             | 197   | 272      | 196    | 210            | 268   | EU//LDH/PLT  |
|                                              | 487, 48.12                                   | 58.96           | 41.04 | 58.12    | 41.88  | 43.93          | 56.07 |              |
|                                              | ≤5.7                                         | 227             | 294   | 220      | 290    | 321            | 192   |              |
|                                              | 525, 51.88                                   | 43.57           | 56.43 | 43.14    | 56.86  | 62.57          | 37.43 |              |
| eGFR1/eGFR2                                  | >5.7                                         | 186             | 141   | 170      | 148    | 143            | 182   | LEU/LDH/PLT  |
|                                              | 333, 42.15                                   | 56.88           | 43.12 | 53.46    | 46.54  | 44.00          | 56.00 |              |
|                                              | ≤5.7                                         | 196             | 257   | 190      | 255    | 281            | 164   |              |
|                                              | 457, 57.85                                   | 43.27           | 56.73 | 42.70    | 57.30  | 63.15          | 36.85 |              |
| eGFR3                                        | >5.7                                         | 97              | 56    | 102      | 48     | 67             | 86    | LEU/LDH/PLT  |
|                                              | 154, 69.37                                   | 63.40           | 36.60 | 68.00    | 32.00  | 43.79          | 56.21 |              |
|                                              | ≤5.7                                         | 31              | 37    | 30       | 35     | 40             | 28    |              |
|                                              | 68, 30.63                                    | 45.59           | 54.41 | 46.15    | 53.85  | 58.82          | 41.18 |              |
| ET ( <i>n</i> = 389)                         |                                              |                 |       |          |        |                |       |              |
| eGFR1-3                                      | >5.7                                         | 78              | 64    | 56       | 85     | 106            | 37    | LEU/PLT      |
|                                              | 144, 37.02                                   | 54.93           | 45.07 | 39.72    | 60.28  | 74.13          | 25.87 |              |
|                                              | ≤5.7                                         | 102             | 142   | 81       | 158    | 204            | 37    |              |
|                                              | 245, 62.98                                   | 41.80           | 58.20 | 33.89    | 66.11  | 84.65          | 15.35 |              |
| eGFR1/eGFR2                                  | >5.7                                         | 52              | 43    | 34       | 60     | 77             | 19    | LEU          |
|                                              | 97, 30.89                                    | 54.74           | 45.26 | 36.17    | 63.83  | 80.21          | 19.79 |              |
|                                              | ≤5.7                                         | 88              | 128   | 71       | 140    | 180            | 33    |              |
|                                              | 217, 69.11                                   | 40.74           | 59.26 | 33.65    | 66.35  | 84.51          | 15.49 |              |
| eGFR3                                        | >5.7                                         | 26              | 21    | 22       | 25     | 29             | 18    | PLT          |
|                                              | 47, 62.67                                    | 55.32           | 44.68 | 46.81    | 53.19  | 61.70          | 38.30 |              |
|                                              | ≤5.7                                         | 14              | 14    | 10       | 18     | 24             | 4     |              |
|                                              | 28, 37.33                                    | 50.00           | 50.00 | 35.71    | 64.29  | 85.71          | 14.29 |              |
| PV ( <i>n</i> = 363)                         |                                              |                 |       |          |        |                |       |              |
| eGFR1-3                                      | >5.7                                         | 124             | 58    | 91       | 84     | 57             | 123   | LEU/LDH/PLT  |
|                                              | 186, 51.24                                   | 68.13           | 31.87 | 52.00    | 48.00  | 31.67          | 68.33 |              |
|                                              | ≤5.7                                         | 81              | 93    | 67       | 104    | 77             | 94    |              |
|                                              | 177, 48.76                                   | 46.55           | 53.45 | 39.18    | 60.82  | 45.03          | 54.97 |              |
| eGFR1/eGFR2                                  | >5.7                                         | 90              | 42    | 58       | 69     | 34             | 95    | LEU/PLT      |
|                                              | 135, 46.71                                   | 68.18           | 31.82 | 45.67    | 54.33  | 26.36          | 73.64 |              |
|                                              | ≤5.7                                         | 72              | 79    | 60       | 89     | 67             | 81    |              |
|                                              | 154, 53.29                                   | 47.68           | 52.32 | 40.27    | 59.73  | 45.27          | 54.73 |              |
| eGFR3                                        | >5.7                                         | 34              | 16    | 33       | 15     | 23             | 28    | LEU/LDH      |
|                                              | 51, 68.92                                    | 68.00           | 32.00 | 68.75    | 31.25  | 45.10          | 54.90 |              |
|                                              | ≤5.7                                         | 9               | 14    | 7        | 15     | 10             | 13    |              |
|                                              | 23, 31.08                                    | 39.13           | 60.87 | 31.82    | 68.18  | 43.48          | 56.52 |              |
| MF ( <i>n</i> = 260)                         |                                              |                 |       |          |        |                |       |              |
| eGFR1-3                                      | >5.7                                         | 81              | 75    | 125      | 27     | 47             | 108   |              |
|                                              | 157, 60.38                                   | 51.92           | 48.08 | 82.24    | 17.76  | 30.32          | 69.68 |              |
|                                              | ≤5.7                                         | 44              | 59    | 72       | 28     | 40             | 61    |              |
|                                              | 103, 39.62                                   | 42.72           | 57.28 | 72.00    | 28.00  | 39.60          | 60.40 |              |
| eGFR1/eGFR2                                  | >5.7                                         | 44              | 56    | 78       | 19     | 32             | 68    |              |
|                                              | 101, 54.01                                   | 44.00           | 56.00 | 80.41    | 19.59  | 32.00          | 68.00 |              |
|                                              |                                              | 55.00           | 52.83 | 56.93    | 42.22  | 48.48          | 57.63 |              |

| MPN subtype<br>(n, % row, % column) | Uric acid, mg/dL<br>(n, % subgroup) | Leukocytes, G/L |       | LDH, U/L |        | Platelets, G/L |       | Significance |
|-------------------------------------|-------------------------------------|-----------------|-------|----------|--------|----------------|-------|--------------|
|                                     |                                     | >8.4            | ≤8.4  | >267.5   | ≤267.5 | >492           | ≤492  |              |
| eGFR3                               |                                     | 36              | 50    | 59       | 26     | 34             | 50    |              |
|                                     | ≤5.7                                | 41.86           | 58.14 | 69.41    | 30.59  | 40.48          | 59.52 |              |
|                                     | 86, 45.99                           | 45.00           | 47.17 | 43.07    | 57.78  | 51.52          | 42.37 |              |
|                                     |                                     | 37              | 19    | 47       | 8      | 15             | 40    |              |
|                                     | >5.7                                | 66.07           | 33.93 | 85.45    | 14.55  | 27.27          | 72.73 |              |
|                                     | 56, 76.71                           | 82.22           | 67.86 | 78.33    | 80.00  | 71.43          | 78.43 |              |
|                                     |                                     | 8               | 9     | 13       | 2      | 6              | 11    |              |
|                                     | ≤5.7                                | 47.06           | 52.94 | 86.67    | 13.33  | 35.29          | 64.71 |              |
| 17, 23.29                           | 17.78                               | 32.14           | 21.67 | 20.00    | 28.57  | 21.57          |       |              |

LEU indicates leukocytes; and PLT, platelets. Bolded values indicate significant P values.

**Table S6.** Median MPN duration across eGFR groups.

| MPN duration, months (n = 1183) | eGFR1 | eGFR2 | eGFR3 | Total | Comparison between pairs | p                 |
|---------------------------------|-------|-------|-------|-------|--------------------------|-------------------|
| n                               | 244   | 660   | 279   | 1183  |                          |                   |
| Median                          | 31.5  | 43.5  | 57.0  | 42.0  |                          |                   |
| Q1                              | 5.0   | 11.5  | 19.0  | 11.0  |                          |                   |
| Q3                              | 77.5  | 104.0 | 132.0 | 105.0 |                          |                   |
|                                 |       |       |       |       | eGFR1 - eGFR2            | <b>0.0002</b>     |
|                                 |       |       |       |       | eGFR1 - eGFR3            | <b>0.0255</b>     |
|                                 |       |       |       |       | eGFR2 - eGFR3            | <b>&lt;0.0003</b> |
|                                 |       |       |       |       |                          | 0.0786            |

Bolded values indicate significant P values.

**Table S7.** MPN duration of >42 months versus ≤42 months across eGFR groups.

| MPN duration, months (n = 1183)<br>(n, % row, % column) | eGFR1 | eGFR2 | eGFR3 | Total  | Comparison between pairs | p             |
|---------------------------------------------------------|-------|-------|-------|--------|--------------------------|---------------|
| >42                                                     | 99    | 332   | 158   | 589    |                          |               |
|                                                         | 16.81 | 56.37 | 26.83 | 49.79  |                          |               |
|                                                         | 40.57 | 50.30 | 56.63 |        |                          |               |
|                                                         | 145   | 328   | 121   | 594    |                          |               |
| ≤42                                                     | 24.41 | 55.22 | 20.37 | 50.21  |                          |               |
|                                                         | 59.43 | 49.70 | 43.37 |        |                          |               |
| Total                                                   | 244   | 660   | 279   | 1183   |                          |               |
|                                                         | 20.63 | 55.79 | 23.58 | 100.00 |                          |               |
|                                                         |       |       |       |        | eGFR1 - eGFR2            | <b>0.0011</b> |
|                                                         |       |       |       |        | eGFR1 - eGFR3            | <b>0.0321</b> |
|                                                         |       |       |       |        | eGFR2 - eGFR3            | <b>0.0009</b> |
|                                                         |       |       |       |        |                          | 0.2586        |

Bolded values indicate significant P values.

**Table S8.** Median MPN duration across creatinine groups.

| MPN duration, months (n = 1183) | Creatinine level, mg/dL |       | Total  | p             |
|---------------------------------|-------------------------|-------|--------|---------------|
|                                 | >0.9                    | ≤0.9  |        |               |
| n                               | 574                     | 609   | 1183   |               |
| Median                          | 49.00                   | 37.00 | 42.00  |               |
| Q1                              | 13.00                   | 8.00  | 11.00  |               |
| Q3                              | 117.00                  | 94.00 | 105.00 |               |
|                                 |                         |       |        | <b>0.0198</b> |

Bolded values indicate significant P values.

**Table S9.** MPN duration of >42 months versus ≤42 months across creatinine groups.

| MPN duration, months (n = 1183) | Creatinine level, mg/dL<br>(n, % row, % column) |       | Total | p |
|---------------------------------|-------------------------------------------------|-------|-------|---|
|                                 | >0.9                                            | ≤0.9  |       |   |
|                                 | >42                                             | 304   |       |   |
|                                 | 52.96                                           | 46.80 | 49.79 |   |
|                                 | 51.61                                           | 48.39 |       |   |
|                                 | 270                                             | 324   | 594   |   |
| ≤42                             | 47.04                                           | 53.20 | 50.21 |   |
|                                 | 45.45                                           | 54.55 |       |   |
| Total                           | 574                                             | 609   | 1183  |   |

48.52 51.48 100.00

0.0363

Bolded values indicate significant *P* values.

**Table S10.** Risk factors for MPN duration longer than 42 months.

| Risk factors for MPN duration >42 months                        | Odds ratio    | 95% CI                | <i>p</i>          |
|-----------------------------------------------------------------|---------------|-----------------------|-------------------|
| Univariate regression                                           |               |                       |                   |
| Diagnosis ( <i>n</i> = 1183)                                    |               |                       |                   |
| ET vs PV ( <i>n</i> = 828)                                      | 0.818         | 0.621 - 1.076         | 0.1502            |
| ET vs MF ( <i>n</i> = 787)                                      | <b>1.709</b>  | <b>1.285 - 2.273</b>  | <b>0.0002</b>     |
| MF vs PV ( <i>n</i> = 751)                                      | <b>0.478</b>  | <b>0.357 - 0.640</b>  | <b>&lt;0.0001</b> |
| Sex (female vs male; <i>n</i> = 1183)                           | 1.239         | 0.986 - 1.556         | 0.0664            |
| JAK2V617F mutation (yes vs no; <i>n</i> = 1100)                 | 0.891         | 0.683 - 1.163         | 0.3963            |
| Diabetes mellitus (yes vs no; <i>n</i> = 1019)                  | <b>0.541</b>  | <b>0.325 - 0.900</b>  | <b>0.0181</b>     |
| Arterial hypertension (yes vs no; <i>n</i> = 829)               | <b>1.531</b>  | <b>1.163 - 2.017</b>  | <b>0.0024</b>     |
| Hyperlipidemia (yes vs no; <i>n</i> = 162)                      | 1.653         | 0.616 - 4.434         | 0.3179            |
| Leukocytes (>8.4 vs ≤8.4 G/L; <i>n</i> = 1181)                  | <b>0.769</b>  | <b>0.611 - 0.966</b>  | <b>0.0243</b>     |
| Platelets (>492 vs ≤492 G/L; <i>n</i> = 1169)                   | 0.844         | 0.671 - 1.063         | 0.1494            |
| Uric acid (>5.7 vs ≤5.7 mg/dL; <i>n</i> = 799)                  | 1.106         | 0.838 - 1.460         | 0.4770            |
| Absolute neutrophil count (>5.48 vs ≤5.48 G/L; <i>n</i> = 1052) | 0.862         | 0.676 - 1.098         | 0.2293            |
| Absolute monocyte count (>0.55 vs ≤0.55 G/L; <i>n</i> = 1106)   | 0.954         | 0.753 - 1.208         | 0.6954            |
| LDH (>267.5 vs ≤267.5 U/L; <i>n</i> = 1141)                     | 1.017         | 0.807 - 1.283         | 0.8836            |
| CRP (>1.4 vs ≤1.4 mg/L; <i>n</i> = 332)                         | 1.142         | 0.739 - 1.763         | 0.5500            |
| MPN therapy (yes vs WW; <i>n</i> = 1087)                        | <b>3.546</b>  | <b>2.729 - 4.606</b>  | <b>&lt;0.0001</b> |
| HU-treated (yes vs WW; <i>n</i> = 659) *                        | <b>3.089</b>  | <b>2.227 - 4.286</b>  | <b>&lt;0.0001</b> |
| RUX-treated (yes vs WW; <i>n</i> = 498) †                       | 1.479         | 0.925 - 2.365         | 0.1020            |
| Other MPN treatment (yes vs WW; <i>n</i> = 742) ‡               | <b>5.133</b>  | <b>3.751 - 7.023</b>  | <b>&lt;0.0001</b> |
| Antithrombotic therapy (yes vs no; <i>n</i> = 1124)             | <b>1.524</b>  | <b>1.178 - 1.972</b>  | <b>0.0013</b>     |
| ASA (yes vs no; <i>n</i> = 921)                                 | <b>1.630</b>  | <b>1.244 - 2.137</b>  | <b>0.0004</b>     |
| P2Y12-antagonists (yes vs no; <i>n</i> = 366) §                 | 1.116         | 0.520 - 2.393         | 0.7785            |
| Anticoagulant-treated (yes vs no; <i>n</i> = 497) ¶             | 1.210         | 0.787 - 1.862         | 0.3854            |
| Multiple regression ( <i>n</i> = 1087) ¶                        |               |                       |                   |
| ET vs MF                                                        | <b>1.598</b>  | <b>1.140 - 2.239</b>  | <b>0.0065</b>     |
| MF vs PV                                                        | <b>0.474</b>  | <b>0.335 - 0.672</b>  | <b>&lt;0.0001</b> |
| HU-treated (yes vs WW)                                          | <b>2.750</b>  | <b>1.971 - 3.838</b>  | <b>&lt;0.0001</b> |
| RUX-treated (yes vs WW)                                         | <b>2.043</b>  | <b>1.231 - 3.392</b>  | <b>0.0057</b>     |
| Other MPN treatment (yes vs WW)                                 | <b>5.381</b>  | <b>3.913 - 7.399</b>  | <b>&lt;0.0001</b> |
| By Diagnosis                                                    |               |                       |                   |
| ET ( <i>n</i> = 308)                                            |               |                       |                   |
| Arterial hypertension (yes vs no)                               | <b>1.738</b>  | <b>1.029 - 2.936</b>  | <b>0.0387</b>     |
| HU-treated (yes vs WW)                                          | <b>2.185</b>  | <b>1.131 - 4.218</b>  | <b>0.0199</b>     |
| Other MPN treatment (yes vs WW)                                 | <b>7.337</b>  | <b>4.043 - 13.315</b> | <b>&lt;0.0001</b> |
| PV ( <i>n</i> = 227)                                            |               |                       |                   |
| Diabetes mellitus (yes vs no)                                   | <b>0.231</b>  | <b>0.081 - 0.662</b>  | <b>0.0064</b>     |
| Arterial hypertension (yes vs no)                               | <b>2.082</b>  | <b>1.089 - 3.981</b>  | <b>0.0266</b>     |
| HU-treated (yes vs WW)                                          | <b>4.251</b>  | <b>1.995 - 9.058</b>  | <b>0.0002</b>     |
| RUX-treated (yes vs WW)                                         | <b>5.036</b>  | <b>1.038 - 24.427</b> | <b>0.0448</b>     |
| Other MPN treatment (yes vs WW)                                 | <b>16.813</b> | <b>6.634 - 42.555</b> | <b>&lt;0.0001</b> |
| MF ( <i>n</i> = 324)                                            |               |                       |                   |
| HU-treated (yes vs WW)                                          | <b>3.249</b>  | <b>1.446 - 7.297</b>  | <b>0.0043</b>     |
| Other MPN treatment (yes vs WW)                                 | <b>3.440</b>  | <b>1.938 - 6.106</b>  | <b>&lt;0.0001</b> |

\* Hydroxyurea. † Ruxolitinib. ‡ Anagrelide, IMiDs, interferon. § P2Y12-antagonist-treated: clopidogrel/ticagrelor/prasugrel. ¶ Anticoagulant-treated: vitamin K-antagonist/dabigatran/rivaroxaban/apixaban/heparin/fondaparinux. ¶¶ Initial model including diagnosis, diabetes mellitus, leukocytes, arterial hypertension, MPN-therapy, and antithrombotic therapy. Bolded values indicate significant odds ratios and significant *P* values.

**Table S11.** Frequencies of thromboses across eGFR groups by risk factor.

| Risk factor ( <i>n</i> = 1420)<br>( <i>n</i> , % row, % column) | TE | eGFR1       | eGFR2        | eGFR3       | Total        | <i>p</i> |
|-----------------------------------------------------------------|----|-------------|--------------|-------------|--------------|----------|
| ET                                                              |    |             |              |             |              | 0.3726   |
| yes                                                             |    | 33<br>23.24 | 75<br>52.82  | 34<br>23.94 | 142<br>26.01 |          |
| no                                                              |    | 96<br>23.76 | 233<br>57.67 | 75<br>18.56 | 404<br>73.99 |          |
| PV                                                              |    | 74.42       | 75.65        | 68.81       |              | 0.0243   |

| Risk factor (n = 1420)<br>(n, % row, % column) | TE  | eGFR1  | eGFR2 | eGFR3 | Total   | p       |       |
|------------------------------------------------|-----|--------|-------|-------|---------|---------|-------|
| MF                                             | yes | 31     | 86    | 44    | 161     | 0.3616  |       |
|                                                |     | 19.25  | 53.42 | 27.33 | 33.68   |         |       |
|                                                | no  | 30.39  | 30.82 | 45.36 | 317     |         |       |
|                                                |     | 71     | 193   | 53    |         |         | 66.32 |
| PMF                                            | yes | 2.40   | 60.88 | 16.72 | 0.3351  |         |       |
|                                                |     | 69.61  | 69.18 | 54.64 |         |         | 285   |
|                                                | no  | 16     | 60    | 35    |         |         |       |
|                                                |     | 14.41  | 54.05 | 31.53 |         |         | 28.03 |
| Post-ET-MF                                     | yes | 21.92  | 28.30 | 31.53 |         | >0.9999 |       |
|                                                |     | 57     | 152   | 76    |         |         | 285   |
|                                                | no  | 20.00  | 53.33 | 26.67 |         |         |       |
|                                                |     | 78.08  | 71.70 | 68.47 |         |         | 90    |
| Post-PV-MF                                     | yes | 15     | 47    | 28    | >0.9999 |         |       |
|                                                |     | 16.67  | 52.22 | 31.11 |         |         | 28.85 |
|                                                | no  | 23.08  | 28.48 | 34.15 |         |         | 222   |
|                                                |     | 50     | 118   | 54    |         |         |       |
| Female gender                                  | yes | 22.52  | 53.15 | 24.32 |         | 0.0321  |       |
|                                                |     | 76.92  | 71.52 | 65.85 |         |         | 13    |
|                                                | no  | 1      | 7     | 5     |         |         |       |
|                                                |     | 7.69   | 53.85 | 38.46 |         |         | 25.00 |
| Male gender                                    | yes | 16.67  | 28.00 | 25.00 | 0.2565  |         |       |
|                                                |     | 5      | 18    | 15    |         |         | 38    |
|                                                | no  | 13.16  | 47.37 | 39.47 |         |         |       |
|                                                |     | 83.33  | 72.00 | 75.00 |         |         | 8     |
| Age at diagnosis >60, years                    | yes | 0      | 6     | 2     |         | 0.3837  |       |
|                                                |     | 0.00   | 75.00 | 25.00 |         |         | 24.24 |
|                                                | no  | 0.00   | 27.27 | 22.22 |         |         | 25    |
|                                                |     | 2      | 16    | 7     |         |         |       |
| Age at diagnosis ≤60, years                    | yes | 8.00   | 64.00 | 28.00 | 0.0364  |         |       |
|                                                |     | 100.00 | 72.73 | 77.78 |         |         | 529   |
|                                                | no  | 34     | 101   | 62    |         |         |       |
|                                                |     | 17.26  | 51.27 | 31.47 |         |         | 27.13 |
| Age at creatinine test >60, years              | yes | 23.61  | 25.06 | 34.64 |         | 0.0903  |       |
|                                                |     | 110    | 302   | 117   |         |         | 529   |
|                                                | no  | 20.79  | 57.09 | 22.12 |         |         |       |
|                                                |     | 76.39  | 74.94 | 65.36 |         |         | 217   |
| Age at creatinine test ≤60, years              | yes | 46     | 120   | 51    | 0.2006  |         |       |
|                                                |     | 21.20  | 55.30 | 23.50 |         |         | 31.27 |
|                                                | no  | 28.75  | 30.30 | 36.96 |         |         | 477   |
|                                                |     | 114    | 276   | 87    |         |         |       |
| Age at diagnosis >60, years                    | yes | 23.90  | 57.86 | 18.24 |         | 0.3837  |       |
|                                                |     | 71.25  | 69.70 | 63.04 |         |         | 191   |
|                                                | no  | 23     | 95    | 73    |         |         |       |
|                                                |     | 12.04  | 49.74 | 38.22 |         |         | 35.10 |
| Age at diagnosis ≤60, years                    | yes | 28.75  | 29.87 | 35.10 | 0.0364  |         |       |
|                                                |     | 57     | 223   | 135   |         |         | 415   |
|                                                | no  | 13.73  | 53.73 | 32.53 |         |         |       |
|                                                |     | 71.25  | 70.13 | 64.90 |         |         | 222   |
| Age at creatinine test >60, years              | yes | 56     | 126   | 40    |         | 0.0903  |       |
|                                                |     | 25.23  | 56.76 | 18.02 |         |         | 27.41 |
|                                                | no  | 25.11  | 26.20 | 37.74 |         |         | 588   |
|                                                |     | 167    | 355   | 66    |         |         |       |
| Age at creatinine test ≤60, years              | yes | 28.40  | 60.37 | 11.22 | 0.0903  |         |       |
|                                                |     | 74.89  | 73.80 | 62.26 |         |         | 240   |
|                                                | no  | 32     | 115   | 93    |         |         |       |
|                                                |     | 13.33  | 47.92 | 38.75 |         |         | 35.63 |
| Age at diagnosis >60, years                    | yes | 31.07  | 27.64 | 35.63 |         | 0.0903  |       |
|                                                |     | 71     | 301   | 168   |         |         | 540   |
|                                                | no  | 13.15  | 55.74 | 31.11 |         |         |       |
|                                                |     | 68.93  | 72.36 | 64.37 |         |         | 240   |
| Age at diagnosis ≤60, years                    | yes | 32     | 115   | 93    | 0.0903  |         |       |
|                                                |     | 13.33  | 47.92 | 38.75 |         |         | 30.77 |
|                                                | no  | 31.07  | 27.64 | 35.63 |         |         | 540   |
|                                                |     | 71     | 301   | 168   |         |         |       |
| Age at creatinine test >60, years              | yes | 13.15  | 55.74 | 31.11 |         | 0.2006  |       |
|                                                |     | 68.93  | 72.36 | 64.37 |         |         | 240   |
|                                                | no  | 32     | 115   | 93    |         |         |       |
|                                                |     | 13.33  | 47.92 | 38.75 |         |         | 30.77 |

| Risk factor (n = 1420)<br>(n, % row, % column) | TE  | eGFR1 | eGFR2  | eGFR3 | Total | p      |
|------------------------------------------------|-----|-------|--------|-------|-------|--------|
| JAK2V617F mutation = yes                       | yes | 48    | 106    | 20    | 174   | 0.0437 |
|                                                |     | 27.59 | 60.92  | 35.71 | 27.19 |        |
|                                                |     | 23.88 | 27.68  |       |       |        |
|                                                | no  | 153   | 277    | 36    | 466   |        |
|                                                |     | 32.83 | 59.44  | 7.73  | 72.81 |        |
|                                                |     | 76.12 | 72.32  | 64.29 |       |        |
| JAK2V617F mutation = no                        | yes | 62    | 161    | 87    | 310   | 0.0322 |
|                                                |     | 20.00 | 51.94  | 28.06 | 32.16 |        |
|                                                |     | 29.81 | 30.21  | 39.01 |       |        |
|                                                | no  | 146   | 372    | 136   | 654   |        |
|                                                |     | 22.32 | 56.88  | 20.80 | 67.84 |        |
|                                                |     | 70.19 | 69.79  | 60.99 |       |        |
| CALR mutation = yes                            | yes | 13    | 45     | 21    | 79    | 0.1596 |
|                                                |     | 16.46 | 56.96  | 26.58 | 22.51 |        |
|                                                |     | 15.66 | 21.84  | 33.87 |       |        |
|                                                | no  | 70    | 161    | 41    | 272   |        |
|                                                |     | 25.74 | 59.19  | 15.07 | 77.49 |        |
|                                                |     | 84.34 | 78.16  | 66.13 |       |        |
| CALR mutation = no                             | yes | 3     | 15     | 1     | 19    | 0.6165 |
|                                                |     | 15.79 | 78.95  | 5.26  | 13.67 |        |
|                                                |     | 7.69  | 18.29  | 5.56  |       |        |
|                                                | no  | 36    | 67     | 17    | 120   |        |
|                                                |     | 30.00 | 55.83  | 14.17 | 86.33 |        |
|                                                |     | 92.31 | 81.71  | 94.44 |       |        |
| Diabetes = yes                                 | yes | 25    | 64     | 33    | 122   | 0.6957 |
|                                                |     | 20.49 | 52.46  | 27.05 | 32.97 |        |
|                                                |     | 30.49 | 32.16  | 37.08 |       |        |
|                                                | no  | 57    | 135    | 56    | 248   |        |
|                                                |     | 22.98 | 54.44  | 22.58 | 67.03 |        |
|                                                |     | 69.51 | 67.84  | 62.92 |       |        |
| Diabetes = no                                  | yes | 8     | 14     | 11    | 33    | 0.0573 |
|                                                |     | 24.24 | 42.42  | 33.33 | 34.02 |        |
|                                                |     | 38.10 | 36.84  | 28.95 |       |        |
|                                                | no  | 13    | 24     | 27    | 64    |        |
|                                                |     | 20.31 | 37.50  | 42.19 | 65.98 |        |
|                                                |     | 61.90 | 63.16  | 71.05 |       |        |
| Arterial hypertension = yes                    | yes | 65    | 189    | 84    | 338   | 0.3167 |
|                                                |     | 19.23 | 55.92  | 24.85 | 29.29 |        |
|                                                |     | 26.42 | 28.17  | 35.44 |       |        |
|                                                | no  | 181   | 482    | 153   | 816   |        |
|                                                |     | 22.18 | 59.07  | 18.75 | 70.71 |        |
|                                                |     | 73.58 | 71.83  | 64.56 |       |        |
| Arterial hypertension = no                     | yes | 28    | 90     | 67    | 185   | 0.9387 |
|                                                |     | 15.14 | 48.65  | 36.22 | 39.53 |        |
|                                                |     | 34.57 | 38.30  | 44.08 |       |        |
|                                                | no  | 53    | 145    | 85    | 283   |        |
|                                                |     | 18.73 | 51.24  | 30.04 | 60.47 |        |
|                                                |     | 65.43 | 61.7   | 55.92 |       |        |
| Hyperlipidemia = yes                           | yes | 35    | 75     | 18    | 128   | 0.0714 |
|                                                |     | 27.34 | 58.59  | 14.06 | 26.23 |        |
|                                                |     | 25.36 | 26.32  | 27.69 |       |        |
|                                                | no  | 103   | 210    | 47    | 360   |        |
|                                                |     | 28.61 | 58.33  | 13.06 | 73.77 |        |
|                                                |     | 74.64 | 73.68  | 72.31 |       |        |
| Hyperlipidemia = no                            | yes | 0     | 7      | 6     | 13    | 0.0714 |
|                                                |     | 0.00  | 53.85  | 46.15 | 61.90 |        |
|                                                |     | 0.00  | 70.0   | 75.00 |       |        |
|                                                | no  | 3     | 3      | 2     | 8     |        |
|                                                |     | 37.50 | 37.50  | 25.00 | 38.10 |        |
|                                                |     | 100.0 | 30.006 | 25.00 |       |        |

| Risk factor (n = 1420)<br>(n, % row, % column) | TE  | eGFR1 | eGFR2 | eGFR3 | Total | p       |
|------------------------------------------------|-----|-------|-------|-------|-------|---------|
| Hyperlipidemia = no                            | yes | 13    | 35    | 9     | 57    | 0.2639  |
|                                                |     | 22.81 | 61.40 | 15.79 | 35.63 |         |
|                                                | no  | 26.53 | 38.89 | 42.86 | 103   | 0.0011  |
|                                                |     | 36    | 55    | 12    | 64.38 |         |
| Leukocytes >8.4, G/L                           | yes | 34.95 | 53.40 | 11.65 | 194   | 0.6514  |
|                                                |     | 73.47 | 61.11 | 57.14 | 27.71 |         |
|                                                | no  | 114   | 276   | 116   | 506   | 0.0336  |
|                                                |     | 22.53 | 54.55 | 22.92 | 72.29 |         |
| Leukocytes ≤8.4, G/L                           | yes | 80.28 | 73.99 | 62.70 | 220   | 0.4083  |
|                                                |     | 52    | 124   | 44    | 31.07 |         |
|                                                | no  | 23.64 | 56.36 | 20.00 | 488   | 0.3087  |
|                                                |     | 32.10 | 29.81 | 33.85 | 68.93 |         |
| Platelets >483, G/L                            | yes | 110   | 292   | 86    | 460   | 0.2209  |
|                                                |     | 22.54 | 59.84 | 17.62 | 65.90 |         |
|                                                | no  | 67.90 | 70.19 | 66.15 | 525   | <0.0001 |
|                                                |     | 31    | 96    | 45    | 172   |         |
| Platelets ≤483, G/L                            | yes | 18.02 | 55.81 | 26.16 | 238   | 0.7214  |
|                                                |     | 20.26 | 23.59 | 32.85 | 34.10 |         |
|                                                | no  | 122   | 311   | 92    | 460   | 0.3087  |
|                                                |     | 23.24 | 59.24 | 17.52 | 69.61 |         |
| Uric acid >5.7, mg/dL                          | yes | 79.74 | 76.41 | 67.15 | 238   | 0.2209  |
|                                                |     | 49    | 121   | 68    | 34.10 |         |
|                                                | no  | 20.59 | 50.84 | 28.57 | 460   | 0.3087  |
|                                                |     | 32.67 | 32.70 | 38.20 | 65.90 |         |
| Uric acid ≤5.7, mg/dL                          | yes | 101   | 249   | 110   | 460   | 0.2209  |
|                                                |     | 21.96 | 54.13 | 23.91 | 65.90 |         |
|                                                | no  | 67.33 | 67.30 | 61.80 | 339   | 0.3087  |
|                                                |     | 22    | 72    | 54    | 148   |         |
| Neutrophils >5.44, G/L                         | yes | 14.86 | 48.65 | 36.49 | 30.39 | 0.2209  |
|                                                |     | 28.95 | 28.02 | 35.06 | 339   |         |
|                                                | no  | 54    | 185   | 100   | 339   | 0.2209  |
|                                                |     | 15.93 | 54.57 | 29.50 | 69.61 |         |
| Uric acid ≤5.7, mg/dL                          | yes | 71.05 | 71.98 | 64.94 | 143   | 0.2209  |
|                                                |     | 35    | 84    | 24    | 143   |         |
|                                                | no  | 24.48 | 58.74 | 16.78 | 27.24 | 0.2209  |
|                                                |     | 23.97 | 27.01 | 35.29 | 382   |         |
| Neutrophils ≤5.44, G/L                         | yes | 111   | 227   | 44    | 382   | 0.2209  |
|                                                |     | 29.06 | 59.42 | 11.52 | 72.76 |         |
|                                                | no  | 76.03 | 72.99 | 64.71 | 72.76 | 0.2209  |
|                                                |     | 20    | 87    | 62    | 169   |         |
| Neutrophils >5.44, G/L                         | yes | 11.83 | 51.48 | 36.69 | 27.04 | 0.2209  |
|                                                |     | 16.00 | 25.66 | 38.51 | 105   |         |
|                                                | no  | 105   | 252   | 99    | 456   | 0.2209  |
|                                                |     | 23.03 | 55.26 | 21.71 | 72.96 |         |
| Neutrophils ≤5.44, G/L                         | yes | 84.00 | 74.34 | 61.49 | 456   | 0.2209  |
|                                                |     | 43    | 117   | 38    | 198   |         |
|                                                | no  | 21.72 | 59.09 | 19.19 | 31.48 | 0.2209  |
|                                                |     | 29.25 | 31.62 | 33.93 | 431   |         |
| Monocytes >0.55, G/L                           | yes | 104   | 253   | 74    | 431   | 0.2209  |
|                                                |     | 24.13 | 58.70 | 17.17 | 68.52 |         |
|                                                | no  | 70.75 | 68.38 | 66.07 | 68.52 | 0.2209  |
|                                                |     | 27    | 102   | 63    | 192   |         |
| Monocytes ≤0.55, G/L                           | yes | 14.06 | 53.13 | 32.81 | 29.54 | 0.0073  |
|                                                |     | 20.00 | 29.82 | 36.42 | 108   |         |
|                                                | no  | 108   | 240   | 110   | 458   | 0.0073  |
|                                                |     | 23.58 | 52.40 | 24.02 | 70.46 |         |
| Monocytes ≤0.55, G/L                           | yes | 80.00 | 70.18 | 63.58 | 70.46 | 0.0073  |
|                                                |     | 27    | 102   | 63    | 192   |         |

| Risk factor (n = 1420)<br>(n, % row, % column) | TE  | eGFR1 | eGFR2 | eGFR3 | Total | p      |
|------------------------------------------------|-----|-------|-------|-------|-------|--------|
| LDH >267.5, U/L                                | yes | 41    | 108   | 41    | 190   | 0.3775 |
|                                                |     | 21.58 | 56.84 | 21.58 | 28.70 |        |
|                                                |     | 27.33 | 27.62 | 33.88 |       |        |
|                                                | no  | 109   | 283   | 80    | 472   |        |
|                                                |     | 23.09 | 59.96 | 16.95 | 71.30 |        |
|                                                |     | 72.67 | 72.38 | 66.12 |       |        |
| LDH ≤267.5, U/L                                | yes | 34    | 113   | 69    | 216   | 0.0749 |
|                                                |     | 15.74 | 52.31 | 31.94 | 31.86 |        |
|                                                |     | 26.56 | 30.62 | 38.12 |       |        |
|                                                | no  | 94    | 256   | 112   | 462   |        |
|                                                |     | 20.35 | 55.41 | 24.24 | 68.14 |        |
|                                                |     | 73.44 | 69.38 | 61.88 |       |        |
| CRP >1.5, mg/L                                 | yes | 42    | 102   | 41    | 185   | 0.1473 |
|                                                |     | 22.70 | 55.14 | 22.16 | 27.29 |        |
|                                                |     | 25.61 | 25.82 | 34.45 |       |        |
|                                                | no  | 122   | 293   | 78    | 493   |        |
|                                                |     | 24.75 | 59.43 | 15.82 | 72.71 |        |
|                                                |     | 74.39 | 74.18 | 65.55 |       |        |
| CRP ≤1.5, mg/L                                 | yes | 10    | 27    | 24    | 61    | 0.1707 |
|                                                |     | 16.39 | 44.26 | 39.34 | 35.47 |        |
|                                                |     | 28.57 | 31.76 | 46.15 |       |        |
|                                                | no  | 25    | 58    | 28    | 111   |        |
|                                                |     | 22.52 | 52.25 | 25.23 | 64.53 |        |
|                                                |     | 71.43 | 68.24 | 53.85 |       |        |
|                                                | yes | 9     | 37    | 12    | 58    | 0.1707 |
|                                                |     | 15.52 | 63.79 | 20.69 | 31.52 |        |
|                                                |     | 20.45 | 33.94 | 38.71 |       |        |
|                                                | no  | 35    | 72    | 19    | 126   |        |
|                                                |     | 27.78 | 57.14 | 15.08 | 68.48 |        |
|                                                |     | 79.55 | 66.06 | 61.29 |       |        |

Bolded values indicate significant P values.

**Table S12.** Distribution of arterial and venous thromboembolism across eGFR groups.

| Type of thromboembolism (n = 1409)<br>(n, % row, % column)    | eGFR1 | eGFR2 | eGFR3 | Total | p       |
|---------------------------------------------------------------|-------|-------|-------|-------|---------|
| Arterial                                                      | 43    | 122   | 63    | 228   | 100.00  |
|                                                               | 18.86 | 53.51 | 27.63 | 16.18 |         |
|                                                               | 14.14 | 15.44 | 20.00 | 14.00 |         |
| Venous including splanchnic                                   | 34    | 72    | 34    | 140   | 100.00  |
|                                                               | 24.29 | 51.43 | 24.29 | 9.94  |         |
|                                                               | 11.18 | 9.11  | 10.79 | 35    |         |
| Arterial and venous including splanchnic                      | 3     | 18    | 14    | 35    | 100.00  |
|                                                               | 8.57  | 51.43 | 40.00 | 2.48  |         |
|                                                               | 0.99  | 2.28  | 4.44  | 1006  |         |
| No thromboembolism                                            | 224   | 578   | 204   | 1006  | 100.00  |
|                                                               | 22.27 | 57.46 | 20.28 | 71.40 |         |
|                                                               | 73.68 | 73.16 | 64.76 |       |         |
| <i>Comparisons between type of thromboembolism</i>            |       |       |       |       |         |
| Arterial vs venous/splanchnic vs no vs arterial + venous      |       |       |       |       | 0.0174  |
| Arterial vs venous/splanchnic vs arterial + venous            |       |       |       |       | 0.5262  |
| Arterial vs venous/splanchnic vs no (excl. arterial + venous) |       |       |       |       | 0.3324  |
| Arterial vs venous (excl. arterial + venous)                  |       |       |       |       | >0.9999 |

Bolded values indicate significant P values.

**Table S13.** Frequency of HU, RUX, anagrelide/IMiDs/interferon, and no therapy across eGFR groups.

| Sample (n = 1215)<br>(n, % row, % column) | Therapy<br>(n, %) | eGFR1 | eGFR2 | eGFR3 | p       |            |
|-------------------------------------------|-------------------|-------|-------|-------|---------|------------|
|                                           |                   |       |       |       | overall | pairwise * |
| All patients (n = 1215)                   |                   |       |       |       | <0.0001 |            |
|                                           | HU only           | 41    | 155   | 60    |         | 0.0021     |
|                                           | (256, 21.07)      | 16.02 | 60.55 | 23.44 |         |            |
|                                           | RUX only          | 14    | 49    | 31    |         | 0.0002     |
|                                           |                   | 15.71 | 22.79 | 21.90 |         |            |



| Sample (n = 1215)<br>(n, % row, % column) | Therapy<br>(n, %)                  | eGFR1 | eGFR2 | eGFR3 | p             |            |
|-------------------------------------------|------------------------------------|-------|-------|-------|---------------|------------|
|                                           |                                    |       |       |       | overall       | pairwise * |
| ET (n = 471)                              | (94, 7.74)                         | 14.89 | 52.13 | 32.98 | <b>0.0001</b> |            |
|                                           |                                    | 5.36  | 7.21  | 11.31 |               |            |
|                                           |                                    | 72    | 167   | 102   |               |            |
|                                           | other<br>(341, 28.07)              | 21.11 | 48.97 | 29.91 |               |            |
|                                           |                                    | 27.59 | 24.56 | 37.23 |               |            |
|                                           |                                    | 49    | 119   | 82    |               |            |
|                                           | Multiple therapies<br>(250, 20.58) | 19.60 | 47.60 | 32.80 |               |            |
|                                           |                                    | 18.77 | 17.50 | 29.93 |               |            |
|                                           |                                    | 134   | 309   | 81    |               |            |
|                                           | WW<br>(524, 43.13)                 | 25.57 | 58.97 | 15.46 |               |            |
|                                           |                                    | 51.34 | 45.44 | 29.56 |               |            |
|                                           |                                    | 17    | 52    | 19    |               |            |
|                                           | HU only<br>(88, 18.68)             | 19.32 | 59.09 | 21.59 |               |            |
|                                           |                                    | 14.66 | 19.48 | 21.59 |               |            |
| PV (n = 395)                              |                                    | 0     | 3     | 2     | 0.5082        |            |
|                                           | RUX only<br>(5, 1.06)              | 0.00  | 60.00 | 40.00 |               |            |
|                                           |                                    | 0.00  | 1.12  | 2.27  |               |            |
|                                           |                                    | 35    | 69    | 44    |               |            |
|                                           | other<br>(148, 31.42)              | 23.65 | 46.62 | 29.73 |               |            |
|                                           |                                    | 30.17 | 25.84 | 50.00 |               |            |
|                                           | Multiple therapies<br>(88, 18.68)  | 20    | 38    | 30    |               |            |
|                                           |                                    | 22.73 | 43.18 | 34.09 |               |            |
|                                           |                                    | 17.24 | 14.23 | 34.09 |               |            |
|                                           |                                    | 64    | 143   | 23    |               |            |
|                                           | WW<br>(230, 48.83)                 | 27.83 | 62.17 | 10.00 |               |            |
|                                           |                                    | 55.17 | 53.56 | 26.14 |               |            |
|                                           |                                    | 22    | 81    | 32    |               |            |
|                                           | HU only<br>(135, 34.18)            | 16.30 | 60.00 | 23.70 |               |            |
|                                           | 28.57                              | 35.06 | 36.78 |       |               |            |
| MF (n = 349)                              |                                    | 2     | 6     | 3     | 0.0103        |            |
|                                           | RUX only<br>(11, 2.78)             | 18.18 | 54.55 | 27.27 |               |            |
|                                           |                                    | 2.60  | 2.60  | 3.45  |               |            |
|                                           |                                    | 22    | 45    | 23    |               |            |
|                                           | other<br>(90, 22.78)               | 24.44 | 50.00 | 25.56 |               |            |
|                                           |                                    | 28.57 | 19.48 | 26.44 |               |            |
|                                           |                                    | 16    | 39    | 22    |               |            |
|                                           | Multiple therapies<br>(77, 19.49)  | 20.78 | 50.65 | 28.57 |               |            |
|                                           |                                    | 20.78 | 16.88 | 25.29 |               |            |
|                                           |                                    | 31    | 99    | 29    |               |            |
|                                           | WW<br>(159, 40.25)                 | 19.50 | 62.26 | 18.24 |               |            |
|                                           |                                    | 40.26 | 42.86 | 33.33 |               |            |
|                                           |                                    | 2     | 22    | 9     |               |            |
|                                           | HU only<br>(33, 9.46)              | 6.06  | 66.67 | 27.27 |               |            |
|                                           | 2.94                               | 12.09 | 9.09  |       |               |            |
| All patients (n = 1251)                   |                                    | 12    | 40    | 26    | 0.0033        |            |
|                                           | RUX only<br>(78, 22.35)            | 15.38 | 51.28 | 33.33 |               |            |
|                                           |                                    | 17.65 | 21.98 | 26.26 |               |            |
|                                           |                                    | 15    | 53    | 35    |               |            |
|                                           | other<br>(103, 29.51)              | 14.56 | 51.46 | 33.98 |               |            |
|                                           |                                    | 22.06 | 29.12 | 35.35 |               |            |
|                                           |                                    | 13    | 42    | 30    |               |            |
|                                           | Multiple therapies<br>(85, 24.36)  | 15.29 | 49.41 | 35.29 |               |            |
|                                           |                                    | 19.12 | 23.08 | 30.30 |               |            |
|                                           |                                    | 39    | 67    | 29    |               |            |
|                                           | WW<br>(135, 38.68)                 | 28.89 | 49.63 | 21.48 |               |            |
|                                           |                                    | 57.35 | 36.81 | 29.29 |               |            |

\* Therapy compared to WW. Bolded values indicate significant P values.

**Table S14.** Frequency of ASA, P2Y12-antagonists, or anticoagulation therapy across eGFR groups.

| Sample (n = 1251)<br>(n, % row, % column) | Therapy<br>(n, %)   | eGFR1 | eGFR2 | eGFR3 | p             |            |
|-------------------------------------------|---------------------|-------|-------|-------|---------------|------------|
|                                           |                     |       |       |       | overall       | pairwise * |
| All patients (n = 1251)                   |                     | 128   | 395   | 131   | <b>0.0033</b> |            |
|                                           | ASA<br>(654, 52.28) | 19.57 | 60.40 | 20.03 |               | 0.3387     |
|                                           | P2Y12-antagonists   | 48.48 | 56.19 | 46.13 |               | >0.9999    |
|                                           |                     | 5     | 17    | 8     |               |            |

| Sample ( <i>n</i> = 1251)<br>( <i>n</i> , % row, % column) | Therapy<br>( <i>n</i> , %) | eGFR1 | eGFR2 | eGFR3  | <i>p</i>      |            |               |
|------------------------------------------------------------|----------------------------|-------|-------|--------|---------------|------------|---------------|
|                                                            |                            |       |       |        | overall       | pairwise * |               |
| ET ( <i>n</i> = 483)                                       | (30, 2.40)                 | 16.67 | 56.67 | 26.67  | 0.0930        |            |               |
|                                                            |                            | 1.89  | 2.42  | 2.82   |               |            |               |
|                                                            | Anticoagulant-treated      | 28    | 51    | 43     |               |            |               |
|                                                            | (122, 9.75)                | 22.95 | 41.80 | 35.25  |               |            | <b>0.0237</b> |
|                                                            |                            | 10.61 | 7.25  | 15.14  |               |            |               |
|                                                            | no                         | 91    | 203   | 81     |               |            |               |
|                                                            | (375, 29.98)               | 24.27 | 54.13 | 21.60  |               |            |               |
|                                                            |                            | 34.47 | 28.88 | 28.52  |               |            |               |
|                                                            | ASA                        | 63    | 156   | 53     |               |            |               |
|                                                            | (272, 56.31)               | 23.16 | 57.35 | 19.49  |               |            | 0.1953        |
|                                                            | 52.07                      | 58.43 | 55.79 |        |               |            |               |
| P2Y12-antagonists                                          | 4                          | 9     | 6     |        |               |            |               |
| (19, 3.93)                                                 | 21.05                      | 47.37 | 31.58 | 0.2967 |               |            |               |
|                                                            | 3.31                       | 3.37  | 6.32  |        |               |            |               |
| Anticoagulant-treated                                      | 8                          | 16    | 10    |        |               |            |               |
| (35, 7.04)                                                 | 23.53                      | 47.06 | 29.41 | 0.1968 |               |            |               |
|                                                            | 6.61                       | 5.99  | 10.53 |        |               |            |               |
| no                                                         | 41                         | 67    | 16    |        |               |            |               |
| (124, 25.67)                                               | 33.06                      | 54.03 | 12.90 |        |               |            |               |
|                                                            | 33.88                      | 25.09 | 16.84 |        |               |            |               |
| PV ( <i>n</i> = 415)                                       |                            |       |       |        | 0.1193        |            |               |
|                                                            | ASA                        | 51    | 157   | 46     |               |            |               |
|                                                            | (254, 61.20)               | 20.08 | 61.81 | 18.11  |               |            | 0.4626        |
|                                                            |                            | 62.96 | 64.08 | 51.69  |               |            |               |
|                                                            | P2Y12-antagonists          | 1     | 6     | 0      |               |            |               |
|                                                            | (7, 1.69)                  | 14.29 | 85.71 | 0.00   |               |            | 0.7311        |
|                                                            |                            | 1.23  | 2.45  | 0.00   |               |            |               |
|                                                            | Anticoagulant-treated      | 14    | 26    | 19     |               |            |               |
|                                                            | (59, 14.22)                | 23.73 | 44.07 | 32.20  |               |            | 0.5388        |
|                                                            |                            | 17.28 | 10.61 | 21.35  |               |            |               |
| no                                                         | 10                         | 43    | 20    |        |               |            |               |
| (73, 17.59)                                                | 13.70                      | 58.90 | 27.40 |        |               |            |               |
|                                                            | 12.35                      | 17.55 | 22.47 |        |               |            |               |
| MF ( <i>n</i> = 353)                                       |                            |       |       |        | <b>0.0047</b> |            |               |
|                                                            | ASA                        | 14    | 82    | 32     |               |            |               |
|                                                            | (128, 36.26)               | 10.94 | 64.06 | 25.00  |               |            | 0.0729        |
|                                                            |                            | 22.58 | 42.93 | 32.00  |               |            |               |
|                                                            | P2Y12-antagonists          | 0     | 2     | 2      |               |            |               |
|                                                            | (4, 1.13)                  | 0.00  | 50.00 | 50.00  |               |            | >0.9999       |
|                                                            |                            | 0.00  | 1.05  | 2.00   |               |            |               |
|                                                            | Anticoagulant-treated      | 6     | 9     | 14     |               |            |               |
|                                                            | (29, 8.22)                 | 20.69 | 31.03 | 48.28  |               |            | 0.0933        |
|                                                            |                            | 9.68  | 4.71  | 14.00  |               |            |               |
| no                                                         | 40                         | 93    | 45    |        |               |            |               |
| (178, 50.42)                                               | 22.47                      | 52.25 | 25.28 |        |               |            |               |
|                                                            | 64.52                      | 48.69 | 45.00 |        |               |            |               |

\* Compared to no therapy. Bolded values indicate significant *P* values.

**Publisher's Note:** MDPI stays neutral with regard to jurisdictional claims in published maps and institutional affiliations.

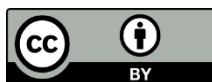

© 2021 by the authors. Licensee MDPI, Basel, Switzerland. This article is an open access article distributed under the terms and conditions of the Creative Commons Attribution (CC BY) license (<http://creativecommons.org/licenses/by/4.0/>).
